# Supplementary material for: Iodine catalyzed oxidation of alcohols and aldehydes to carboxylic acids in water: a metal-free route to the synthesis of furandicarboxylic acid and terephthalic acid
Source: Royal Society of Chemistry journal article supplement (doi:10.1039/c7gc02802d), 2017-01-01

## Supporting Information

### **Iodine Catalyzed Oxidation of Alcohols and Aldehydes to Carboxylic Acids in Water: A Metal-Free Route to Synthesis of Furandicarboxylic Acid and Terephthalic Acid**

Susanta Hazra, Mayukh Deb, and Anil. J. Elias<sup>\*</sup>

*Department of Chemistry, Indian Institute of Technology Delhi, Hauz Khas, New Delhi-110016.*

***Email:*** [eliasanil@gmail.com](mailto:eliasanil@gmail.com)

## Contents

|                                                                                              |         |
|----------------------------------------------------------------------------------------------|---------|
| 1. General information .....                                                                 | S3      |
| 2. Effect of catalysts on the C-H oxidation (Table S1). ....                                 | S4      |
| 3. Effect of amount of catalyst loading for the oxidation reaction (Table -S2) .....         | S5      |
| 4. Effect of oxidant used for the reaction (Table-S3).....                                   | S5      |
| 5. Effect of amount of oxidant used for oxidation reaction (Table-S4).....                   | S6      |
| 6. Optimization of reaction conditions for oxidation of aldehyde (Table-S5).....             | S6      |
| 7. Effect of base, solvent and temperature used for the reaction (Table- S5).....            | S7      |
| 8. General procedure for oxidation of alcohols and aldehydes.....                            | S8      |
| 9. Gram scale/ one pot synthesis of FDCA and Terephthalic acid.....                          | S8-S9   |
| 10. References .....                                                                         | S10     |
| 11. Identification of products, $^1\text{H}$ and $^{13}\text{C}\{^1\text{H}\}$ NMR data..... | S11-S17 |
| 12. $^1\text{H}$ and $^{13}\text{C}\{^1\text{H}\}$ NMR spectra of prepared compounds.....    | S18-S58 |

## General Information

Unless otherwise stated, all reactions were performed under open atmosphere.  $^1\text{H}$  and  $^{13}\text{C}$  NMR spectra were recorded on a Bruker Spectrospin DPX-300 NMR spectrometer at 300 and 75.47 MHz, respectively. All chemical shifts ( $\delta$ ) are reported in ppm and coupling constants (J) in Hz. All chemical shifts are related to residual solvent peaks [ $\text{CDCl}_3$ : 7.26 ( $^1\text{H}$ ), 77.16 ( $^{13}\text{C}$ );  $\text{DMSO-d}_6$ : 2.50 ( $^1\text{H}$ ), 39.52 ( $^{13}\text{C}$ )]. All alcohols and aldehydes were purchased from commercial sources and hydroxymethylfurfural (HMF) was prepared according to literature procedure.<sup>[1]</sup> Deionised water, TBHP (70% in water), iodine and NaOH were used as received.

## Experimental Section:

**Table S1:** Effect of catalysts on the C-H oxidation.

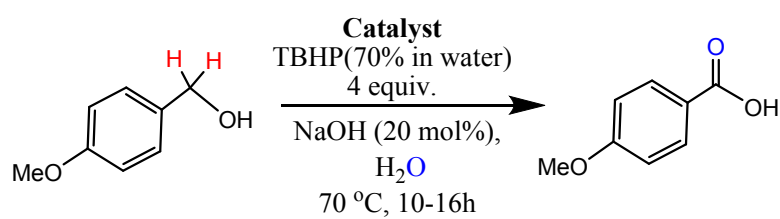

| Entry No. | Catalyst       | % of yield (isolated) |
|-----------|----------------|-----------------------|
| 1         | —              | —                     |
| 2         | I <sub>2</sub> | 90                    |
| 3         | KI             | 48                    |
| 4         | NaI            | 46                    |
| 5         | TBAI           | 15                    |
| 6         | TBAB           | 0                     |

**Table S2:** Effect of amount of catalyst loading for the oxidation reaction.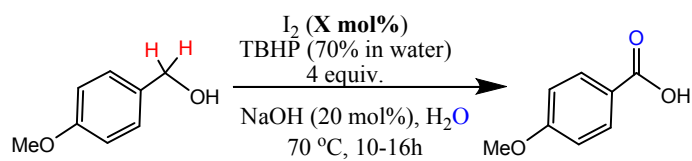

| Entry No. | Amount of $I_2$ (X mol%) | % of yield (isolated) |
|-----------|--------------------------|-----------------------|
| 1         | —                        | —                     |
| 2         | 2                        | 23                    |
| 3         | 4                        | 35                    |
| 4         | 5                        | 46                    |
| 5         | 6                        | 58                    |
| 6         | 8                        | 63                    |
| 7         | 10                       | 90                    |
| 8         | 12                       | 90                    |
| 9         | 15                       | 90                    |
| 10        | 20                       | 90                    |

**Table S3:** Effect of oxidant used for the reaction.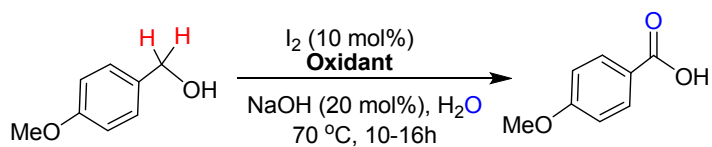

| Entry No. | Oxidant     | % of yield (isolated) |
|-----------|-------------|-----------------------|
| 1         | —           | —                     |
| 2         | aq. TBHP    | 90                    |
| 3         | $O_2$       | 0                     |
| 4         | $H_2O_2$    | 5                     |
| 5         | DTBP        | 0                     |
| 6         | $K_2S_2O_8$ | 0                     |
| 7         | NMO         | 0                     |

**Table S4:** Effect of amount of oxidant used for oxidation reaction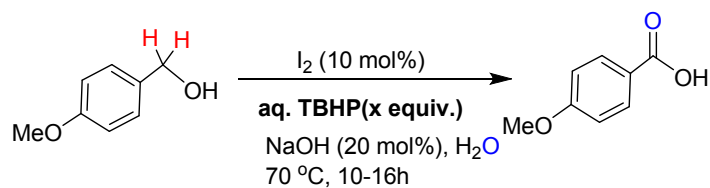

| Entry No.            | aq. TBHP (x equiv.) | % of yield (isolated) |
|----------------------|---------------------|-----------------------|
| <b>1</b>             | —                   | —                     |
| <b>2</b>             | 1                   | 15                    |
| <b>3</b>             | 2                   | 32                    |
| <b>4</b>             | 3                   | 47                    |
| <b>5<sup>a</sup></b> | <b>4</b>            | <b>90</b>             |
| <b>6</b>             | 5                   | 90                    |
| <b>7</b>             | 10                  | 90                    |

a. Since the TBHP used was 70% in water, it is equivalent to 2.8 equivalent of pure TBHP.

**Table S5:** Optimization of reaction conditions for oxidation of aldehyde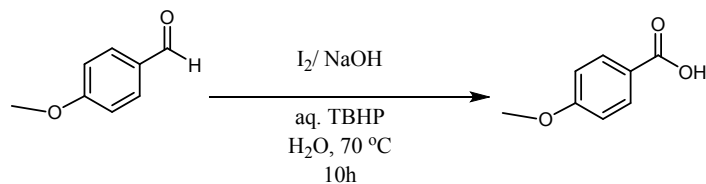

| Entry No | Iodine (X mol%) | aq. TBHP (Y equiv.) | NaOH (Z mol%) | Reaction temperature/°C | Yield (isolated) |
|----------|-----------------|---------------------|---------------|-------------------------|------------------|
| 1        | -               | -                   | -             | 70                      | -                |
| 2        | 5               | 1                   | 10            | 70                      | 58               |
| 3        | 5               | 1.5                 | 10            | 70                      | 68               |
| <b>4</b> | <b>5</b>        | <b>2</b>            | <b>10</b>     | <b>70</b>               | <b>73</b>        |
| 5        | 10              | 1.5                 | 20            | 70                      | 77               |
| <b>6</b> | <b>10</b>       | <b>2</b>            | <b>20</b>     | <b>70</b>               | <b>84</b>        |
| <b>7</b> | <b>10</b>       | <b>4</b>            | <b>20</b>     | <b>70</b>               | <b>95</b>        |

**Table S6:** Effect of base, solvent and temperature used for the reaction

| Entry No.            | Base (20mol%)                   | Solvent               | Temperature /°C | % of yield (isolated) |
|----------------------|---------------------------------|-----------------------|-----------------|-----------------------|
| 1                    | NaOH                            | H <sub>2</sub> O      | RT              | 0                     |
| 2                    | NaOH                            | H <sub>2</sub> O      | 50              | 42                    |
| 3                    | NaOH                            | H <sub>2</sub> O      | 60              | 65                    |
| <b>4<sup>a</sup></b> | <b>NaOH</b>                     | <b>H<sub>2</sub>O</b> | <b>70</b>       | <b>90</b>             |
| 5                    | KOH                             | H <sub>2</sub> O      | 70              | 81                    |
| 6                    | Na <sub>2</sub> CO <sub>3</sub> | H <sub>2</sub> O      | 70              | 37                    |
| 7                    | K <sub>2</sub> CO <sub>3</sub>  | H <sub>2</sub> O      | 70              | 31                    |
| 8                    | -                               | H <sub>2</sub> O      | 70              | 0                     |
| 9                    | NaOAc                           | H <sub>2</sub> O      | 70              | 30                    |
| 10                   | KOAc                            | H <sub>2</sub> O      | 70              | 26                    |
| 11                   | NaOH                            | DMSO                  | 70              | 0                     |
| 12                   | NaOH                            | DCM                   | 70              | 0                     |
| 13                   | NaOH                            | 1,4 dioxane           | 70              | 0                     |
| 14                   | NaOH                            | CH <sub>3</sub> CN    | 70              | 31                    |
| 15                   | NaOH                            | tert-Butanol          | 70              | 38                    |

a. Reaction was also carried out with 1 equiv. of NaOH at 100 °C with yield of 90%.

### General procedure for oxidation of alcohols

A 15 ml screw capped vial was charged with a magnetic bead, 5 mmol of alcohol, 0.5 mmol (10 mol%) of  $I_2$  and 20 mmol (4 equiv.) of aq. TBHP (70% in  $H_2O$ ). Afterwards, 1 mmol (20 mol%) of NaOH with additional 2 mL of deionized water (pH = 10) were added to the reaction mixture and it was heated at 70 °C for 10-16 h. Afterwards, the reaction mixture was neutralized by aq. HCl and extracted with EtOAc and aq.  $Na_2S_2O_3$  solution. The organic layer was dried over anhydrous  $Na_2SO_4$  and after evaporation of the solvent analytically pure carboxylic acids were obtained.<sup>[2,3]</sup>

### **General procedure for oxidation of aldehydes**

A 15 ml screw capped vial was charged with a magnetic bead, 5 mmol of aldehyde, 0.5 mmol (10 mol%) of  $I_2$  and 20 mmol (4 equiv.) of aq. TBHP. Afterwards, 1 mmol (20 mol%) of NaOH with additional 2 mL of deionized water (pH = 10) were added to the reaction mixture and it was heated at 70 °C for 10-16 h. Afterwards, the reaction mixture was neutralized by aq. HCl and extracted with EtOAc and aq.  $Na_2S_2O_3$  solution. The organic layer was dried over anhydrous  $Na_2SO_4$  and after evaporation of the solvent analytically pure carboxylic acids were obtained.<sup>[2,3]</sup>

### **Gram scale synthesis of FDCA from HMF**

A 1000 ml of round bottom flask was charged with a magnetic bead, 79.36 mmol (10 gm) of HMF, 15.87 mmol (20 mol%) of  $I_2$  and 634 mmol (8 equiv.) of aq. TBHP. Afterwards, 39.70 mmol (50 mol%) of NaOH with additional 100 mL of  $H_2O$  were added to the reaction mixture and it was heated at 70 °C for 36 h. Afterwards, the reaction mixture was neutralized by aq. HCl and extracted with EtOAc and aq.  $Na_2S_2O_3$  solution. The organic layer was dried over anhydrous  $Na_2SO_4$  and after evaporation of the solvent analytically pure FDCA was obtained in 53% yield (6.55 gm).<sup>[2,4]</sup>

### **One pot synthesis of FDCA from D-fructose**

To a 150 mL flask equipped with stirrer bars, D-fructose (4.5 g, 25 mmol), isopropyl alcohol (50 mL), and hydrochloric acid (12.5M aqueous solution, 0.1 mL) were added. The reaction flask was heated on an oil bath to 120 °C with stirring. The reaction was stopped after 4 h and the mixture was filtrated to remove insoluble humin by-product. Solvent in the reaction mixture was then evaporated and dried to give the crude HMF product (3.15 gm). Afterwards, I<sub>2</sub> (5 mmol), aq. TBHP (200 mmol, 8 equiv.), NaOH (12.5 mmol) and H<sub>2</sub>O (50 mL) were added and the reaction mixture was stirred at 70 °C for 36h. Afterwards, the reaction mixture was neutralized by aq. HCl and extracted with EtOAc and aq. Na<sub>2</sub>S<sub>2</sub>O<sub>3</sub> solution. The organic layer was dried over anhydrous Na<sub>2</sub>SO<sub>4</sub> and after evaporation of the solvent FDCA was obtained in 41% yield (1.61 gm).

#### **Gram scale synthesis of Terephthalic acid**

A 100 ml of round bottom flask was charged with a magnetic bead, 14.48 mmol (2 gm) of 1, 4-benzenedimethanol, 2.89 mmol (20 mol%) of I<sub>2</sub> and 115.84 mmol (8 equiv.) of aq. TBHP. Afterwards, 7.24 mmol (50 mol%) of NaOH with additional 10 mL of H<sub>2</sub>O were added to the reaction mixture and it was heated at 70 °C for 36 h. Afterwards, the reaction mixture was neutralized by aq. HCl and extracted with EtOAc and aq. Na<sub>2</sub>S<sub>2</sub>O<sub>3</sub> solution. The organic layer was dried over anhydrous Na<sub>2</sub>SO<sub>4</sub> and after evaporation of the solvent analytically pure terephthalic was obtained.<sup>[3]</sup>

#### **References:**

- [1] L. Lai, Y. Zhang, *ChemSusChem* **2011**, 4, 1745-1748.
- [2] M. S. Ahmed, D.S. mannel, T. W. Root, S. S. Stahl, *Org. Process Res. Dev.* **2017**, DOI: 10.1021/acs.oprd.7b00223.
- [3] A. Sarbajna, I. Dutta, P. Daw, S. Dinda, S. M. W. Rahaman, A. Sarkar, J. K. Bera, *ACS Catal.* **2017**, 7, 2786-2790.
- [4] N. Jiang, B. You, R. Boonstra, I. M. T. Rodriguez, Y. Sun, *ACS Energy Lett.* **2016**, 1, 386-390.

**Identification of products:**

### Compound 1

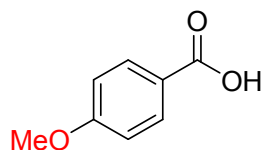

<sup>1</sup>H-NMR (CDCl<sub>3</sub>, 300 MHz, ppm): 11.62 (br, 1H), 8.05-8.08 (d, J= 9Hz, 2H), 6.93-6.96 (d, J= 9Hz, 2H), 3.88 (s, 3H); <sup>13</sup>C-NMR (CDCl<sub>3</sub>, 75 MHz, ppm): 171.51, 164.06, 132.36, 121.61, 113.76, 55.48

### Compound 2

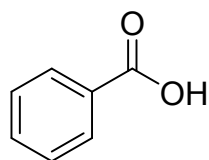

<sup>1</sup>H-NMR (CDCl<sub>3</sub>, 300 MHz, ppm): 11.13 (br, 1H), 8.16 (m, J= 9Hz, 2H), 7.55 (t, 1H), 7.50 (t, 2H); <sup>13</sup>C-NMR (CDCl<sub>3</sub>, 75 MHz, ppm): 172.33, 133.82, 130.24, 129.35, 128.50.

### Compound 3

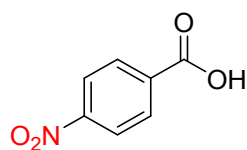

<sup>1</sup>H-NMR (DMSO-d<sub>6</sub>, 300 MHz, ppm): 13.62 (br, 1H), 8.30-8.32 (d, J= 6Hz, 2H), 8.16-8.19 (d, 2H); <sup>13</sup>C-NMR (DMSO-d<sub>6</sub>, 75 MHz, ppm): 166.16, 150.36, 136.81, 131.04, 123.79.

### Compound 4

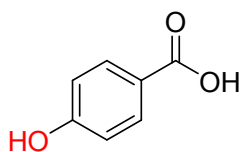

$^1\text{H-NMR}$  (DMSO- $\text{d}_6$ , 300 MHz, ppm): 12.43 (br, 1H), 10.24(s, 1H), 7.82-7.85 (d,  $J$ = 9Hz, 2H), 6.84-6.87 (d,  $J$ = 9Hz, 2H);  $^{13}\text{C-NMR}$  (DMSO- $\text{d}_6$ , 75 MHz, ppm): 167.65, 162.06, 132.00, 121.82, 115.57.

### Compound 5

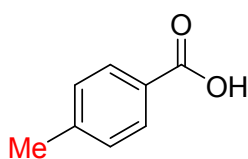

$^1\text{H-NMR}$  ( $\text{CDCl}_3$ , 300 MHz, ppm): 11.57 (br, 1H), 7.91 (d,  $J$ = 9Hz, 2H), 7.17-7.20 (d,  $J$ = 9Hz, 2H), 2.34 (s, 3H);  $^{13}\text{C-NMR}$  ( $\text{CDCl}_3$ , 75 MHz, ppm): 172.55, 144.67, 130.28, 129.22, 126.62, 21.77.

### Compound 6

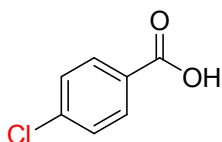

$^1\text{H-NMR}$  (DMSO- $\text{d}_6$ , 300 MHz, ppm): 13.20 (br, 1H), 7.85-7.88 (d,  $J$ = 9Hz, 2H), 7.68-7.72 (d,  $J$ = 12Hz, 2H);  $^{13}\text{C-NMR}$  (DMSO- $\text{d}_6$ , 75 MHz, ppm): 167.05, 132.14, 131.74, 130.48, 127.32.

### Compound 7

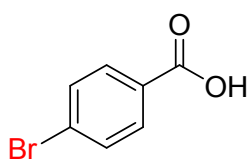

$^1\text{H}$ -NMR (DMSO- $\text{d}_6$ , 300 MHz, ppm): 13.19 (br, 1H), 7.84-7.87 (d,  $J$ = 9Hz, 2H), 7.67-7.71 (d,  $J$ = 12Hz, 2H);  $^{13}\text{C}$ -NMR (DMSO- $\text{d}_6$ , 75 MHz, ppm): 167.05, 132.14, 131.74, 130.48, 127.32.

### Compound 8

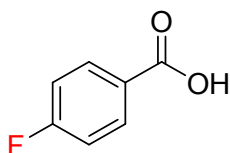

$^1\text{H}$ -NMR ( $\text{CDCl}_3$ , 300 MHz): 8.13-8.16 (m, 2H), 7.15 (m, 2H);  $^{13}\text{C}$ -NMR ( $\text{CDCl}_3$ , 75 MHz): 171.5, 166.7, 133.2, 125.8 (d,  $J$  = 2.6 Hz), 116.1;  $^{19}\text{F}$ -NMR ( $\text{CDCl}_3$ ): -104.1 (s, 1F).

### Compound 9

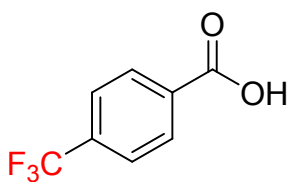

$^1\text{H}$ -NMR (DMSO- $\text{d}_6$ , 300 MHz, ppm): 13.46 (br, 1H), 8.12-8.15 (d,  $J$ = 9Hz, 2H), 7.86-7.89 (d,  $J$ = Hz, 2H);  $^{13}\text{C}$ -NMR (DMSO- $\text{d}_6$ , 75 MHz, ppm): 167.05, 132.14, 131.74, 130.48, 127.32.

### Compound 10

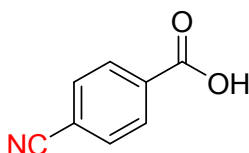

$^1\text{H}$ -NMR (DMSO- $\text{d}_6$ , 300 MHz, ppm): 13.42 (br, 1H), 8.11-8.14 (d,  $J$ = 9Hz, 2H), 7.83-7.86 (d,  $J$ = 9Hz, 2H);  $^{13}\text{C}$ -NMR (DMSO- $\text{d}_6$ , 75 MHz, ppm): 167.15, 137.24, 132.14, 131.74, 118.48, 115.32.

### Compound 11

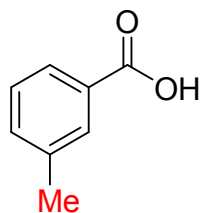

$^1\text{H-NMR}$  ( $\text{CDCl}_3$ , 300 MHz, ppm): 12.76 (br, 1H), 7.80 (s, 1H), 7.17-7.25 (m, 3H), 2.27 (s, 3H);  $^{13}\text{C-NMR}$  ( $\text{CDCl}_3$ , 75 MHz, ppm): 172.96, 138.31, 134.65, 130.75, 129.33, 127.44, 21.25.

### Compound 12

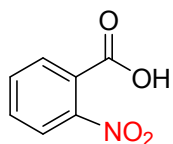

$^1\text{H-NMR}$  ( $\text{DMSO-d}_6$ , 300 MHz, ppm): 13.87 (br, 1H), 7.73-8.30 (m, 4H);  $^{13}\text{C-NMR}$  ( $\text{DMSO-d}_6$ , 75 MHz, ppm): 166.16, 150.36, 136.81, 131.04, 123.79.

### Compound 13

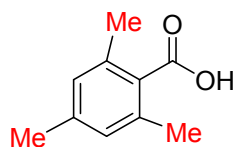

$^1\text{H-NMR}$  ( $\text{DMSO-d}_6$ , 300 MHz, ppm): 13.06 (br, 1H), 6.90 (s, 2H), 1.98-2.34 (m, 9H);  $^{13}\text{C-NMR}$  ( $\text{CDCl}_3$ , 75 MHz, ppm): 171.28, 138.43, 134.33, 128.70, 21.45, 19.50.

### Compound 14

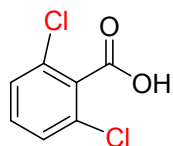

$^1\text{H}$ -NMR (DMSO- $d_6$ , 300 MHz, ppm): 13.82 (br, 1H), 7.64(t, 1H), 7.17-7.25 (m, 2H);  $^{13}\text{C}$ -NMR (DMSO- $d_6$ , 75 MHz, ppm): 162.56, 161.40, 158.06, 133.54, 112.76.

### Compound 15

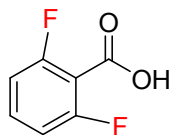

$^1\text{H}$ -NMR (DMSO- $d_6$ , 300 MHz, ppm): 13.92 (br, 1H), 7.63(t, 1H), 7.17-7.23 (m, 2H);  $^{13}\text{C}$ -NMR (DMSO- $d_6$ , 75 MHz, ppm): 162.66, 161.30, 158.06, 133.44, 112.86.

### Compound 16

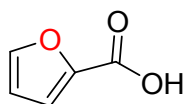

$^1\text{H}$ -NMR ( $\text{CDCl}_3$ , 300 MHz, ppm): 11.95 (br, 1H), 7.57 (s, 1H), 7.27 (s, 1H), 6.48 (s, 1H);  $^{13}\text{C}$ -NMR ( $\text{CDCl}_3$ , 75 MHz, ppm): 163.87, 147.49, 143.80, 120.23, 112.30.

### Compound 17

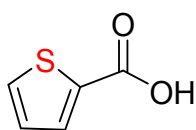

$^1\text{H}$ -NMR ( $\text{CDCl}_3$ , 300 MHz, ppm): 12.16 (br, 1H), 7.82 (d, 1H), 7.56 (d, 1H), 7.06 (s, 1H);  $^{13}\text{C}$ -NMR ( $\text{CDCl}_3$ , 75 MHz, ppm): 168.12, 135.11, 134.13, 132.89, 128.12.

### Compound 18

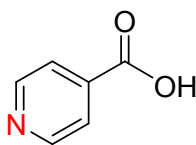

$^1\text{H}$ -NMR (DMSO- $\text{d}_6$ , 300 MHz, ppm): 13.68 (br, 1H), 8.76-8.68 (d,  $J$ = 9Hz, 2H), 7.80-7.82 (d, 2H);  $^{13}\text{C}$ -NMR (DMSO- $\text{d}_6$ , 75 MHz, ppm): 166.60, 151.30, 138.54, 123.20.

### Compound 19

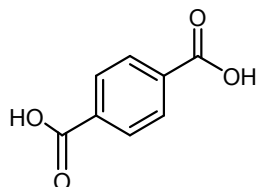

$^1\text{H}$ -NMR (DMSO- $\text{d}_6$ , 300 MHz, ppm): 8.04 (s, 4H), 13.30 (br, s, 2H);  $^{13}\text{C}$ -NMR (DMSO- $\text{d}_6$ , 75 MHz, ppm): 129.91, 134.90, 167.12.

### Compound 20

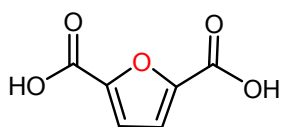

$^1\text{H}$ -NMR (DMSO- $\text{d}_6$ , 300 MHz, ppm): 7.30 (s, 2H),  $^{13}\text{C}$ -NMR (DMSO- $\text{d}_6$ , 75 MHz, ppm): 159.40, 147.53, 118.77.

### Compound 21

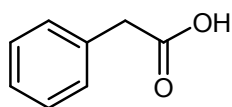

$^1\text{H}$ -NMR ( $\text{CDCl}_3$ , 300 MHz, ppm): 7.38-7.27 (m, 5H), 3.66 (s, 2H);  $^{13}\text{C}$ -NMR ( $\text{CDCl}_3$ , 75 MHz, ppm): 178.01, 133.20, 129.30, 128.6, 127.32, 41.05.

### Compound 22

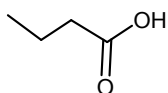

$^1\text{H}$ -NMR ( $\text{CDCl}_3$ , 300 MHz, ppm): 11.70 (s, 1H), 2.35 (t,  $J = 7.4$  Hz, 2H), 1.68 (m, 2H), 1.00 (t,  $J = 7.5$  Hz, 3H);  $^{13}\text{C}$ -NMR ( $\text{CDCl}_3$ , 75 MHz, ppm): 180.00, 36.00, 18.72, 13.35.

### Compound 23

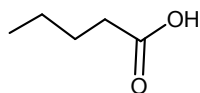

$^1\text{H}$ -NMR ( $\text{CDCl}_3$ , 300 MHz, ppm): 11.73 (s, 1H), 2.35 (t,  $J = 7.4$  Hz, 2H), 1.68 (m, 2H), 1.00 (m,  $J = 7.5$  Hz, 2H), 0.98 (t, 3H);  $^{13}\text{C}$ -NMR ( $\text{CDCl}_3$ , 75 MHz, ppm): 180.05, 26.00, 23.78, 18.75, 13.15

### Compound 24

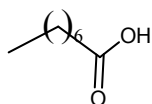

$^1\text{H}$ -NMR ( $\text{CDCl}_3$ , 300 MHz, ppm): 11.80 (br, s, 1H), 2.34 (t,  $J = 7.7$  Hz, 2H), 1.61 (m, 2H), 1.29 (m, 8H), 0.88 (m, 3H);  $^{13}\text{C}$ -NMR ( $\text{CDCl}_3$ , 75 MHz, ppm): 176.87, 34.3, 31.9, 29.2, 29.1, 25.9, 22.30, 13.45.

### Compound 25

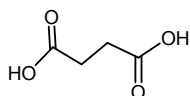

$^1\text{H}$ -NMR ( $\text{DMSO-d}_6$ , 300 MHz, ppm): 11.30 (b, 2H), 2.43 (m, 4H);  $^{13}\text{C}$ -NMR ( $\text{DMSO-d}_6$ , 75 MHz, ppm): 174.09, 29.18

$^1\text{H}$ - NMR (in  $\text{CDCl}_3$ ) spectra of compound **1**

4-OMe pure COOH

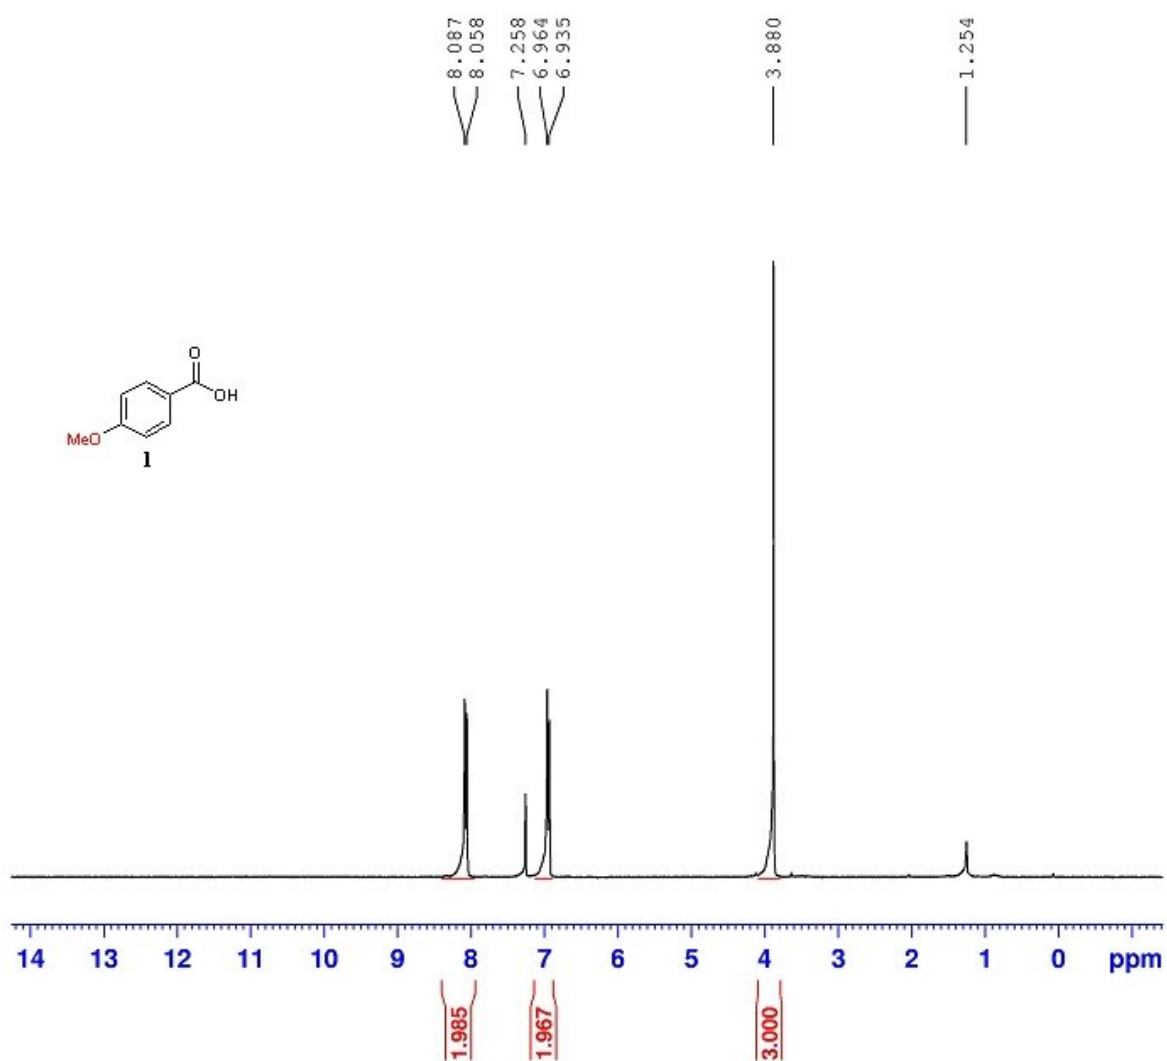

$^{13}\text{C}\{^1\text{H}\}$ - NMR (in  $\text{CDCl}_3$ ) spectra of compound **1**

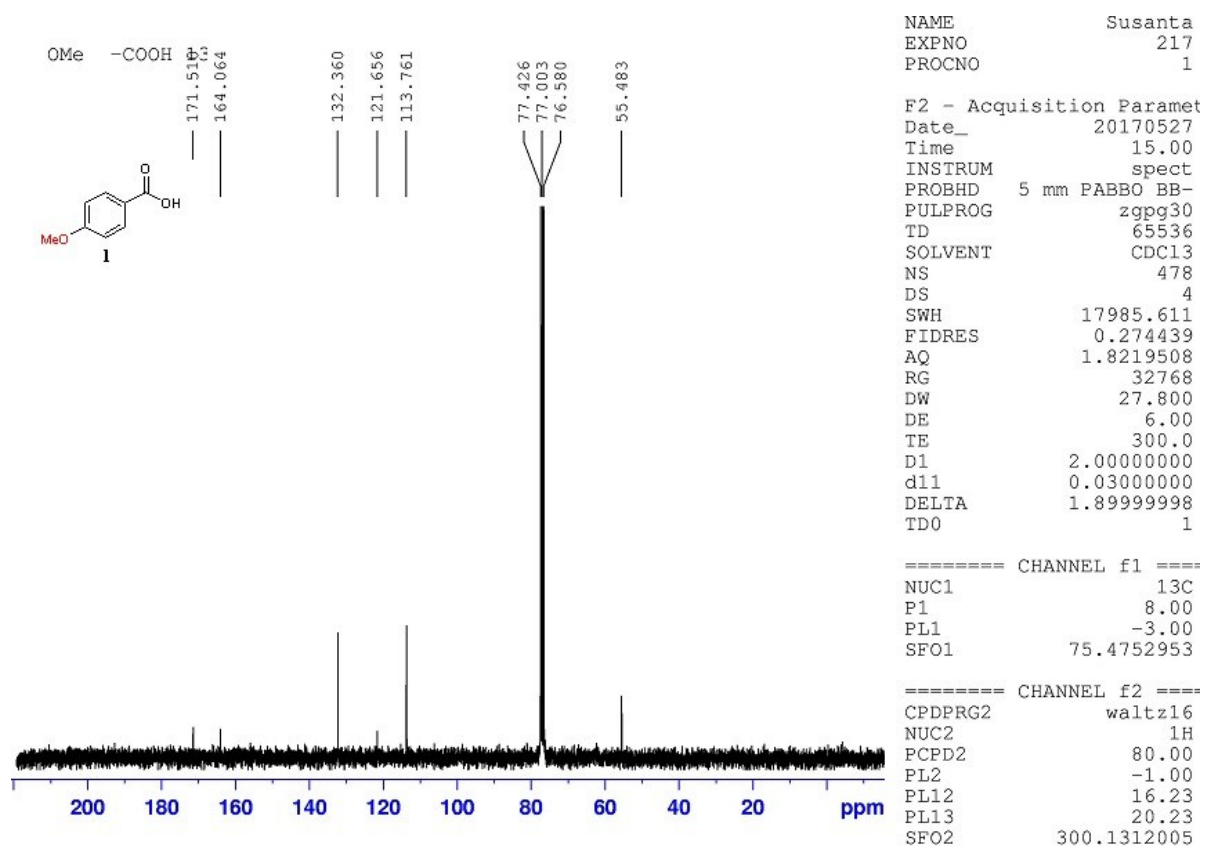

<sup>1</sup>H- NMR (in DMSO-d<sub>6</sub>) spectra of compound 3

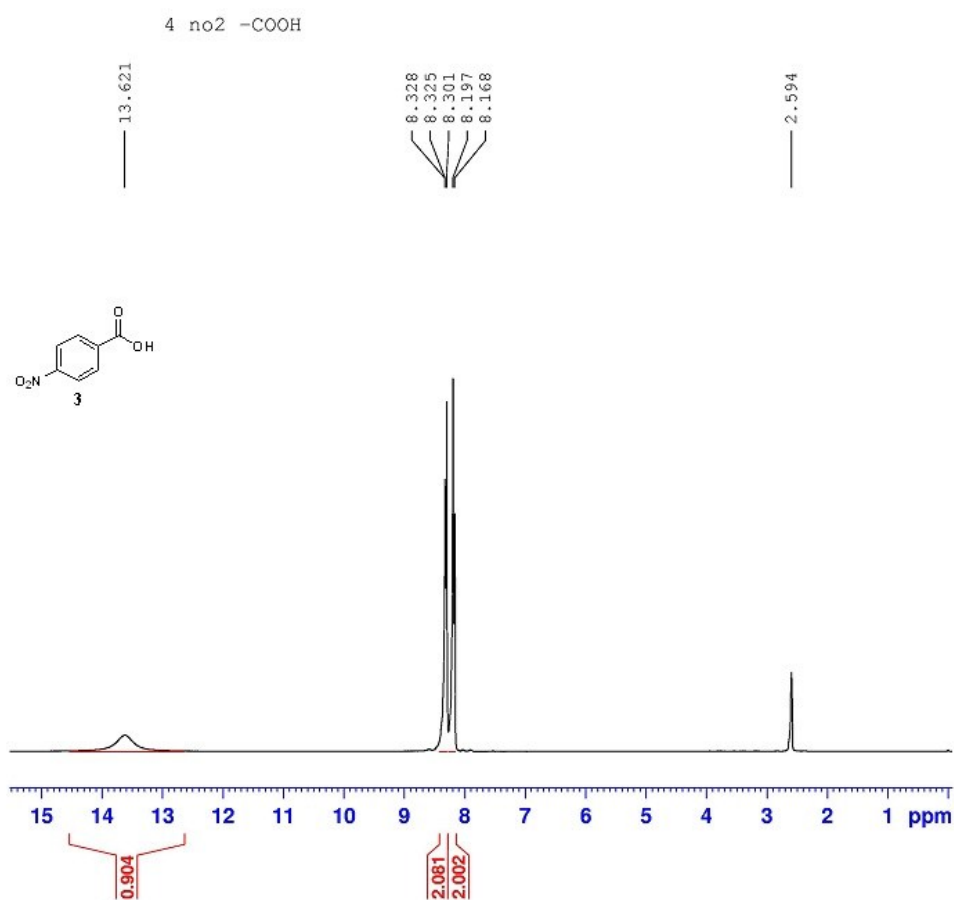

Current Data Parameters  
NAME Susanta  
EXPNO 213  
PROCNO 1

F2 - Acquisition Parameters  
Date\_ 20170527  
Time 14.38  
INSTRUM spect  
PROBHD 5 mm F4BBO BB-  
PULPROG zg30  
TD 65536  
SOLVENT DMSO  
NS 10  
DS 2  
SWH 6172.839 Hz  
FIDRES 0.094190 Hz  
AQ 5.3084660 sec  
RG 90.5  
DW 81.000 usec  
DE 6.00 usec  
TE 300.0 K  
D1 1.00000000 sec  
TD0 1

===== CHANNEL f1 =====  
NUC1 1H  
P1 11.00 usec  
PL1 -1.00 dB  
SFO1 300.1318534 MHz

F2 - Processing parameters  
SI 32768  
SF 300.1299746 MHz  
WDW EM  
SSB 0  
LB 0.30 Hz  
GB 0  
PC 1.00

$^{13}\text{C}\{^1\text{H}\}$ - NMR (in DMSO- $d_6$ ) spectra of compound **3**

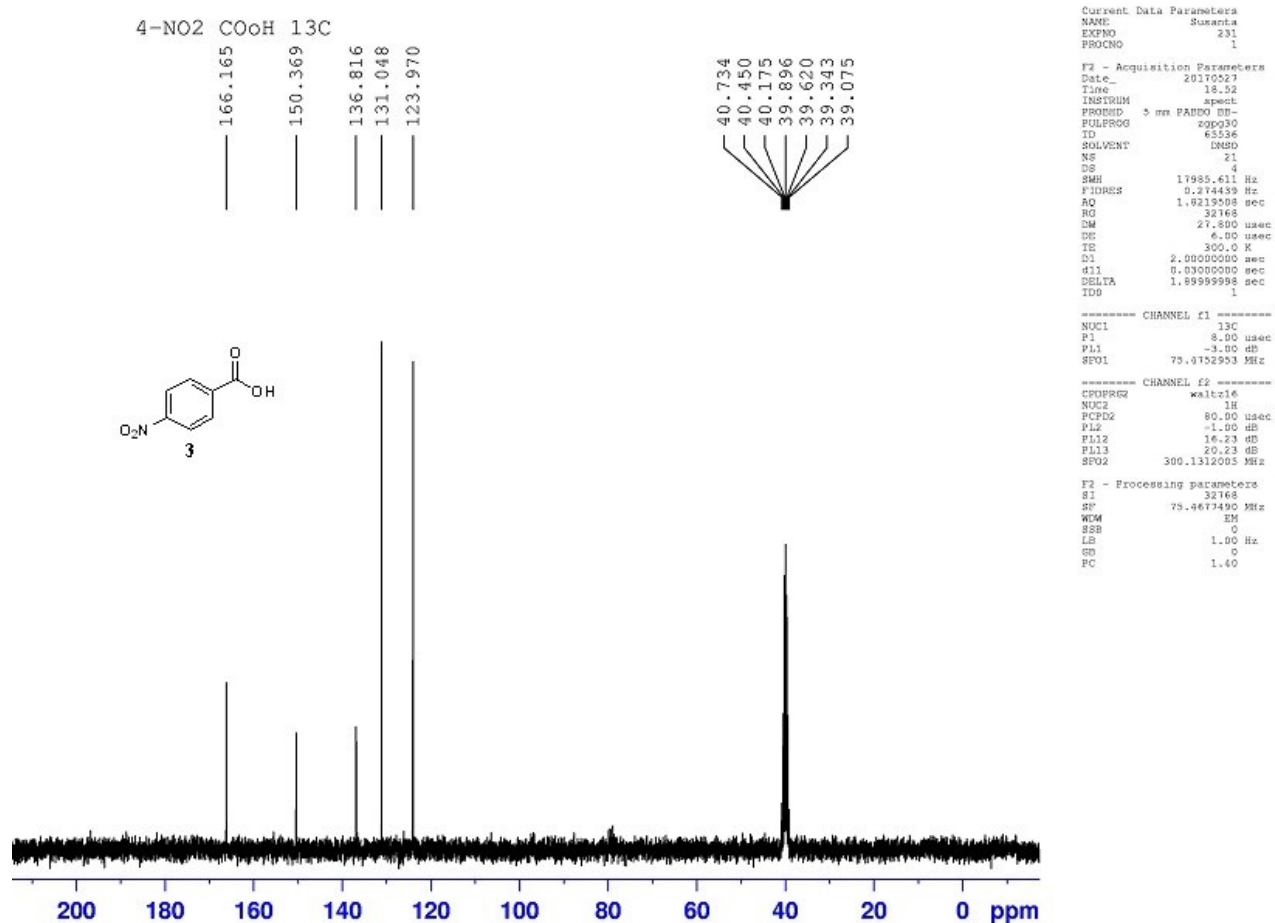

<sup>1</sup>H- NMR (in DMSO-d<sub>6</sub>) spectra of compound **4**

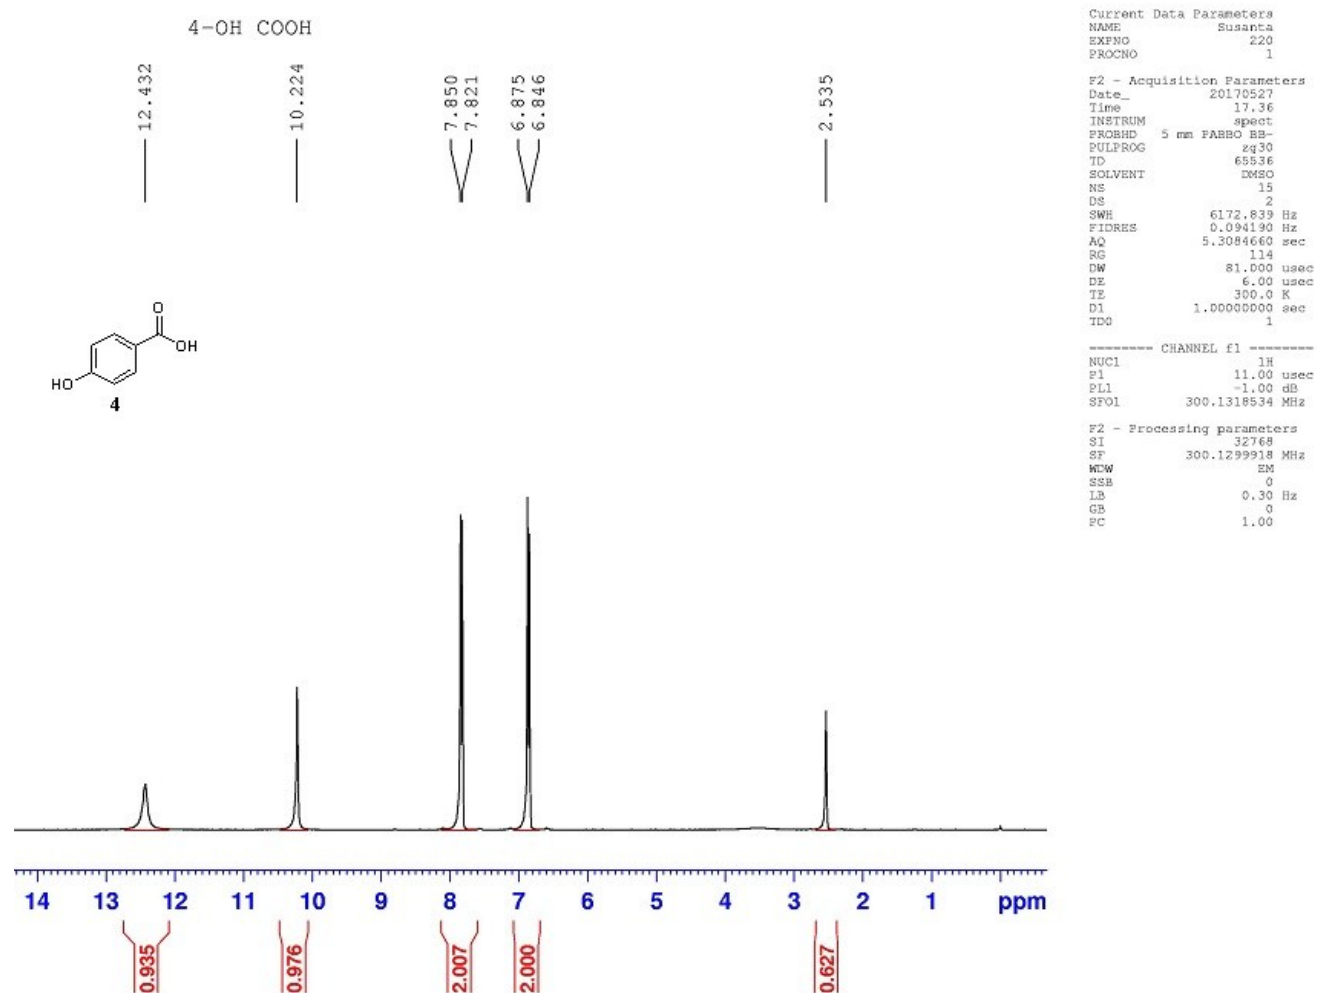

$^{13}\text{C}\{^1\text{H}\}$ - NMR (in DMSO- $d_6$ ) spectra of compound 4

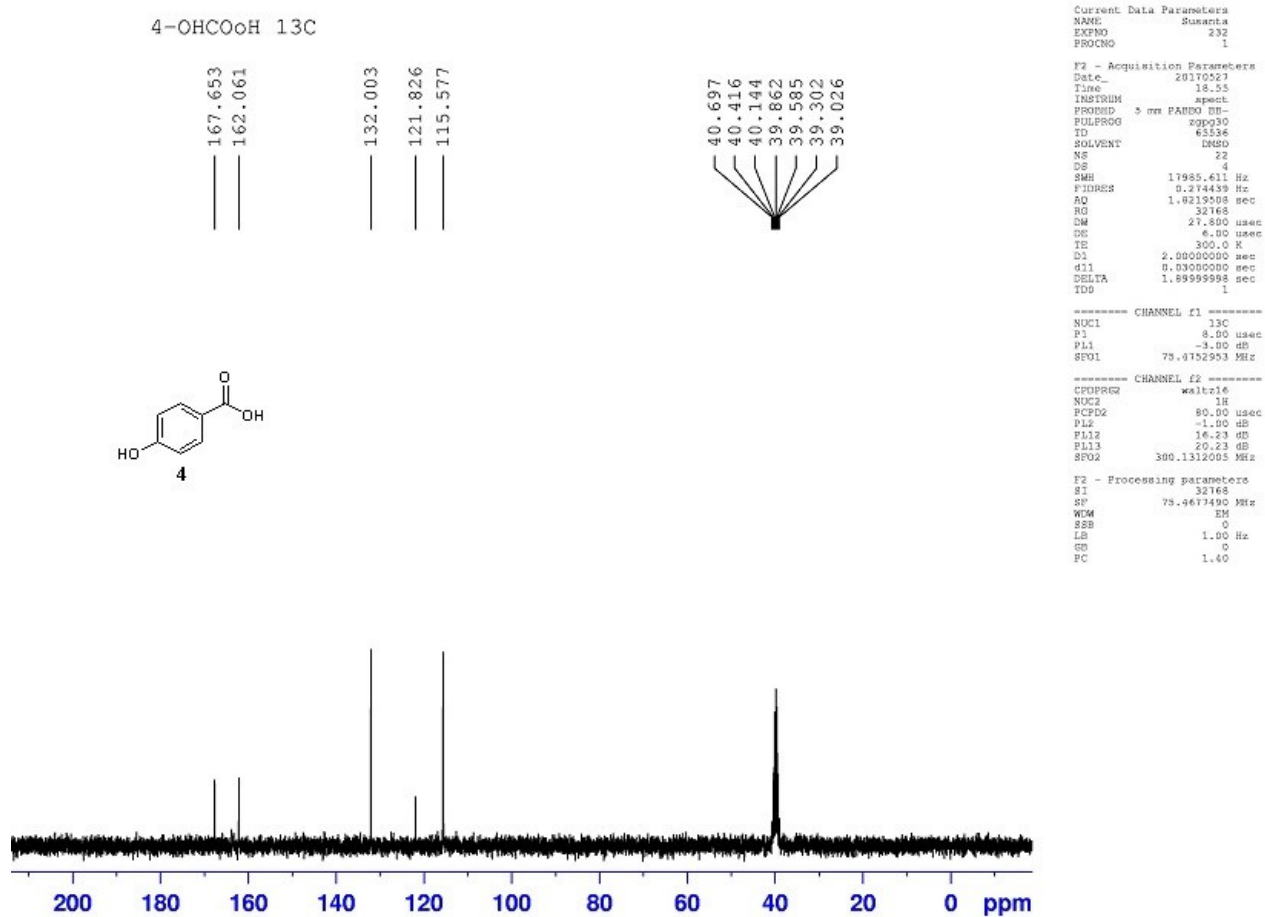

<sup>1</sup>H- NMR (in CDCl<sub>3</sub>) spectra of compound **5**

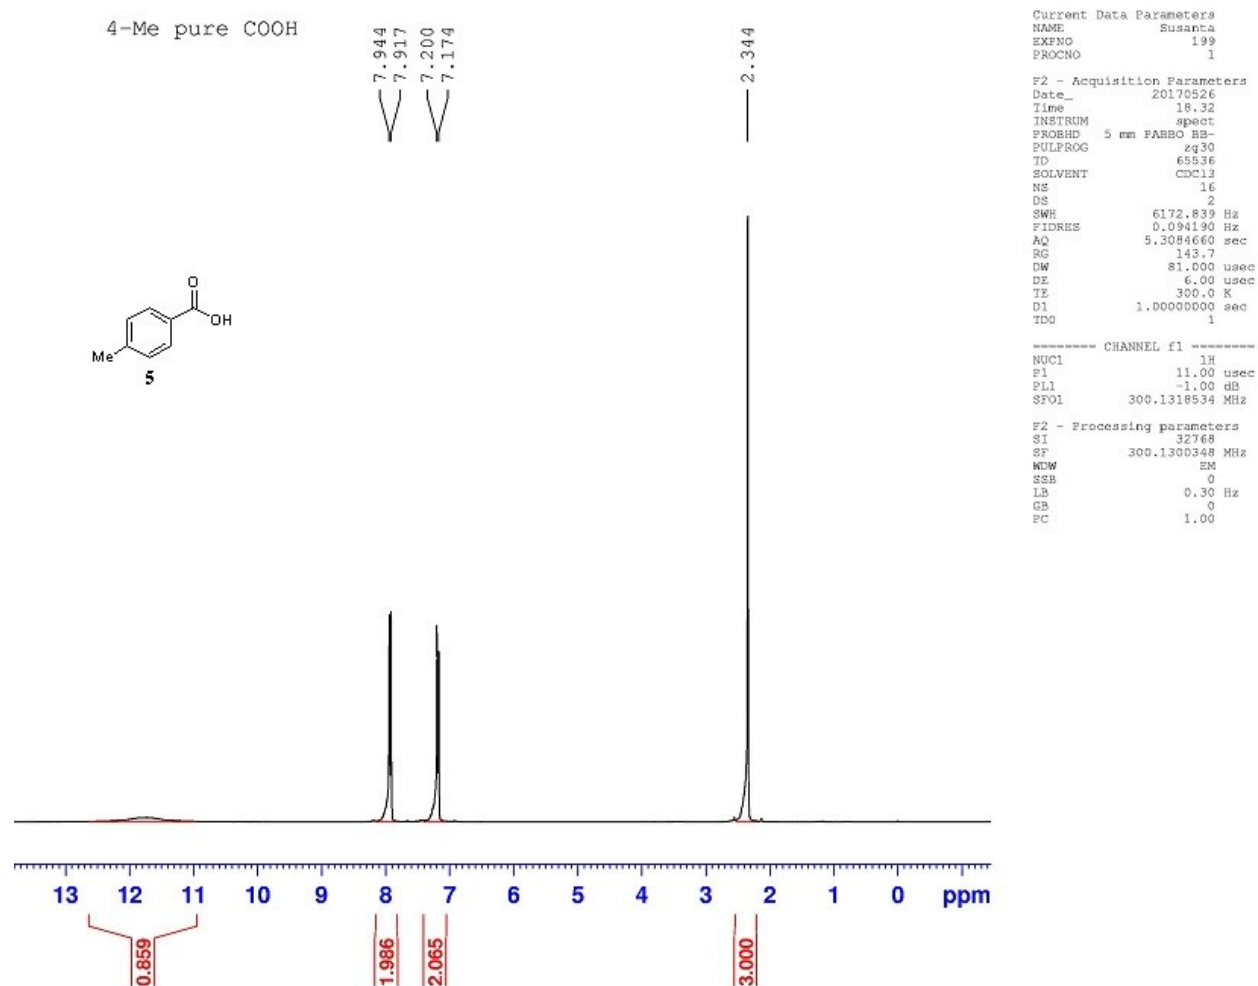

$^{13}\text{C}\{^1\text{H}\}$ - NMR (in  $\text{CDCl}_3$ ) spectra of compound **5**

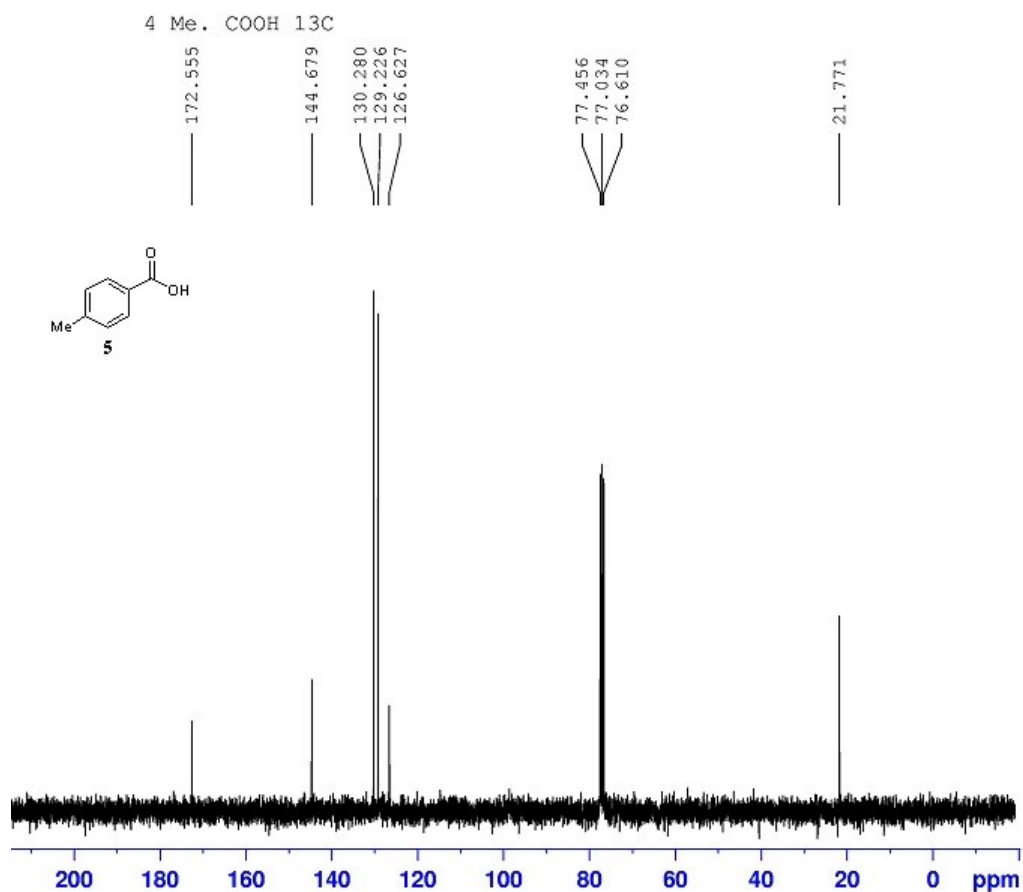

```

Current Data Parameters
NAME      Susarla
EXPNO     206
PROCNO    1

F2 - Acquisition Parameters
Date_     20170527
Time      12.03
INSTRUM   spect
PROBHD    5 mm PAUDD BB-
PULPROG   zgpg30
TD         65536
SOLVENT   CDCl3
NS         52
DS         4
SMH        17985.611 Hz
FIDRES     0.274439 Hz
AQ         1.8219508 sec
RG         32768
DM         27.800 usec
DE         6.00 usec
TE         300.0 K
D1         2.00000000 sec
d11        0.03000000 sec
DELTA     1.89999998 sec
TD0        1

===== CHANNEL f1 =====
NUC1       13C
P1         8.00 usec
PL1        -3.00 dB
SFO1       75.0762953 MHz

===== CHANNEL f2 =====
CPDPRG2    waltz16
NUC2       1H
PCPD2      80.00 usec
PL2        -1.00 dB
PL12       16.23 dB
PL13       20.23 dB
SFO2       300.1312005 MHz

F2 - Processing parameters
SI         32768
SF         75.0677490 MHz
WDW        EM
SSB        0
LB         1.00 Hz
GB         0
PC         1.40
    
```

<sup>1</sup>H- NMR (in DMSO-d<sub>6</sub>) spectra of compound 6

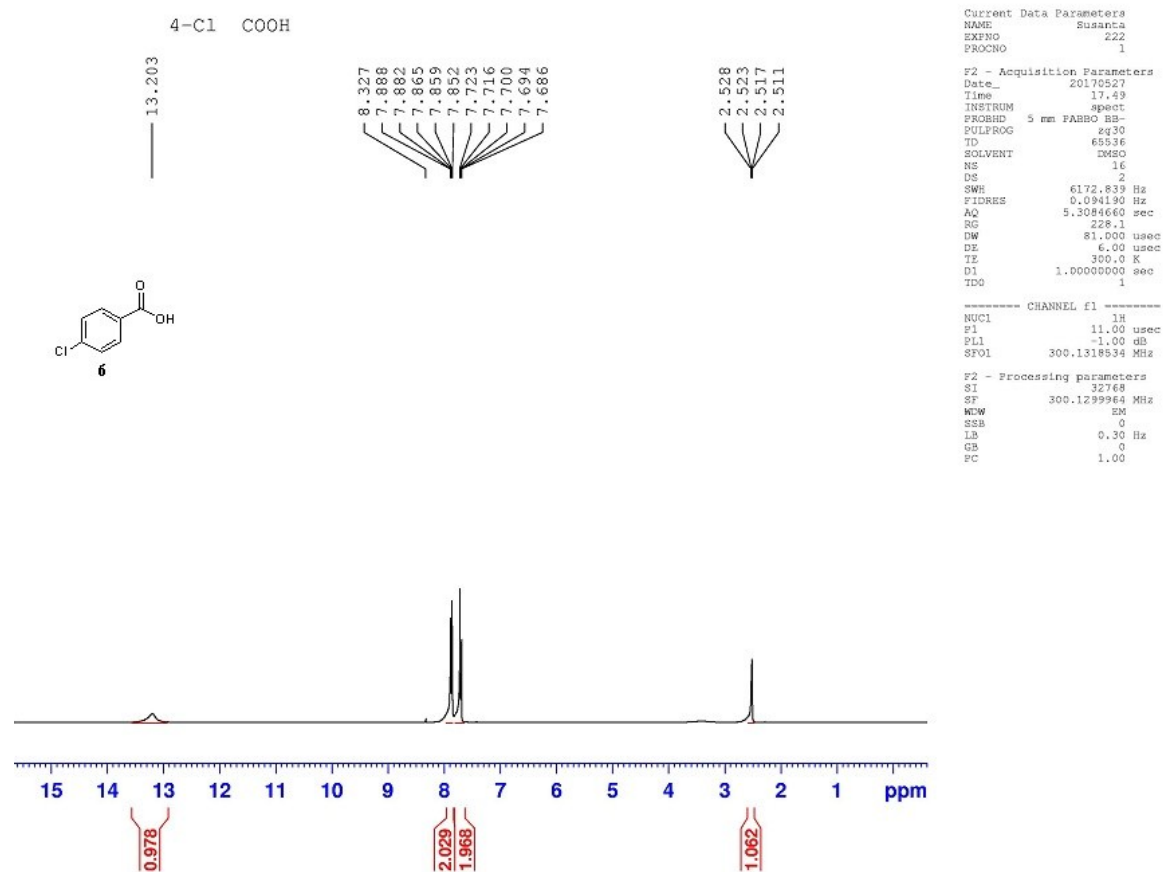

<sup>1</sup>H- NMR (in DMSO-d<sub>6</sub>) spectra of compound 7

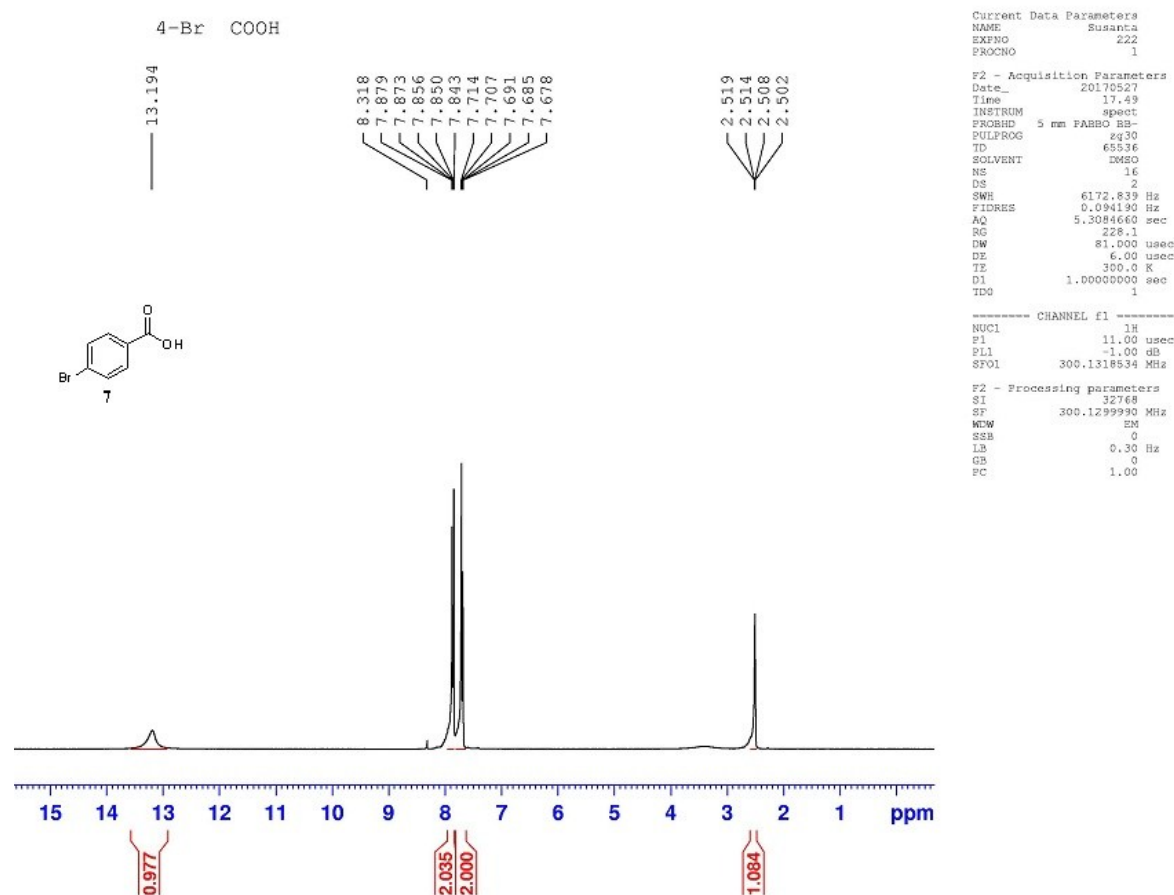

$^{13}\text{C}\{^1\text{H}\}$ - NMR (in DMSO- $d_6$ ) spectra of compound **7**

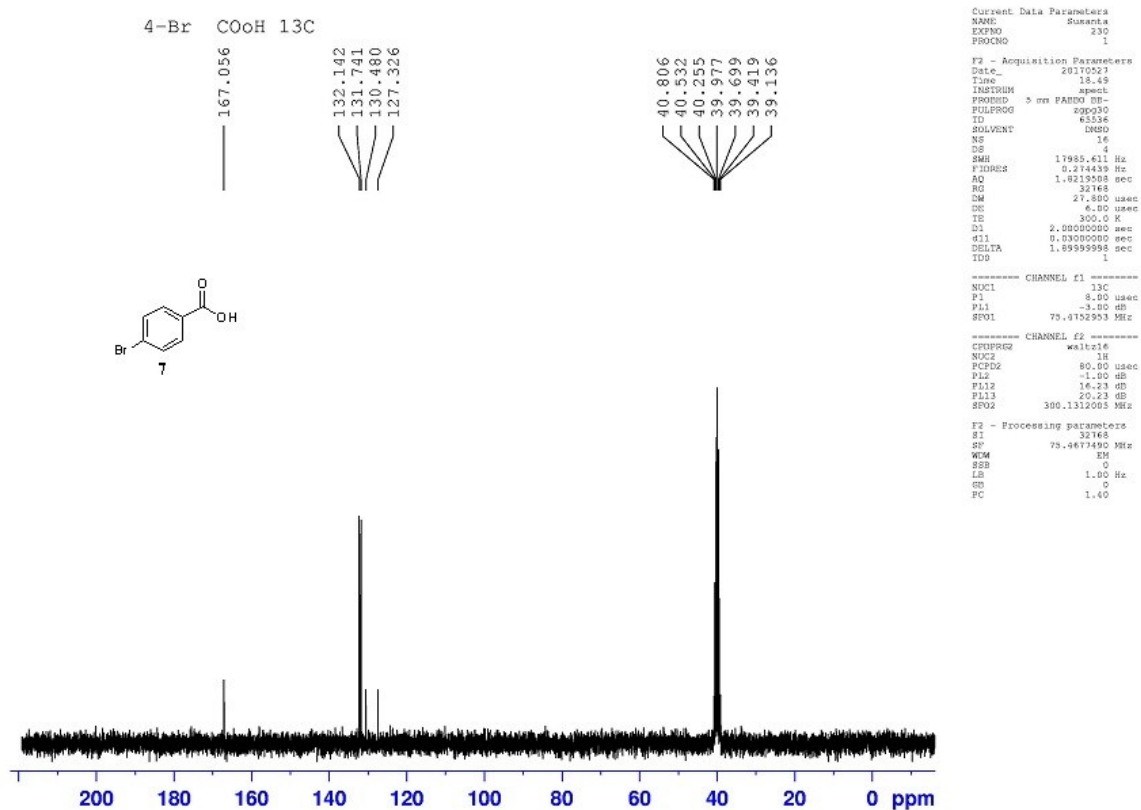

<sup>1</sup>H- NMR (in DMSO-d<sub>6</sub>) spectra of compound **9**

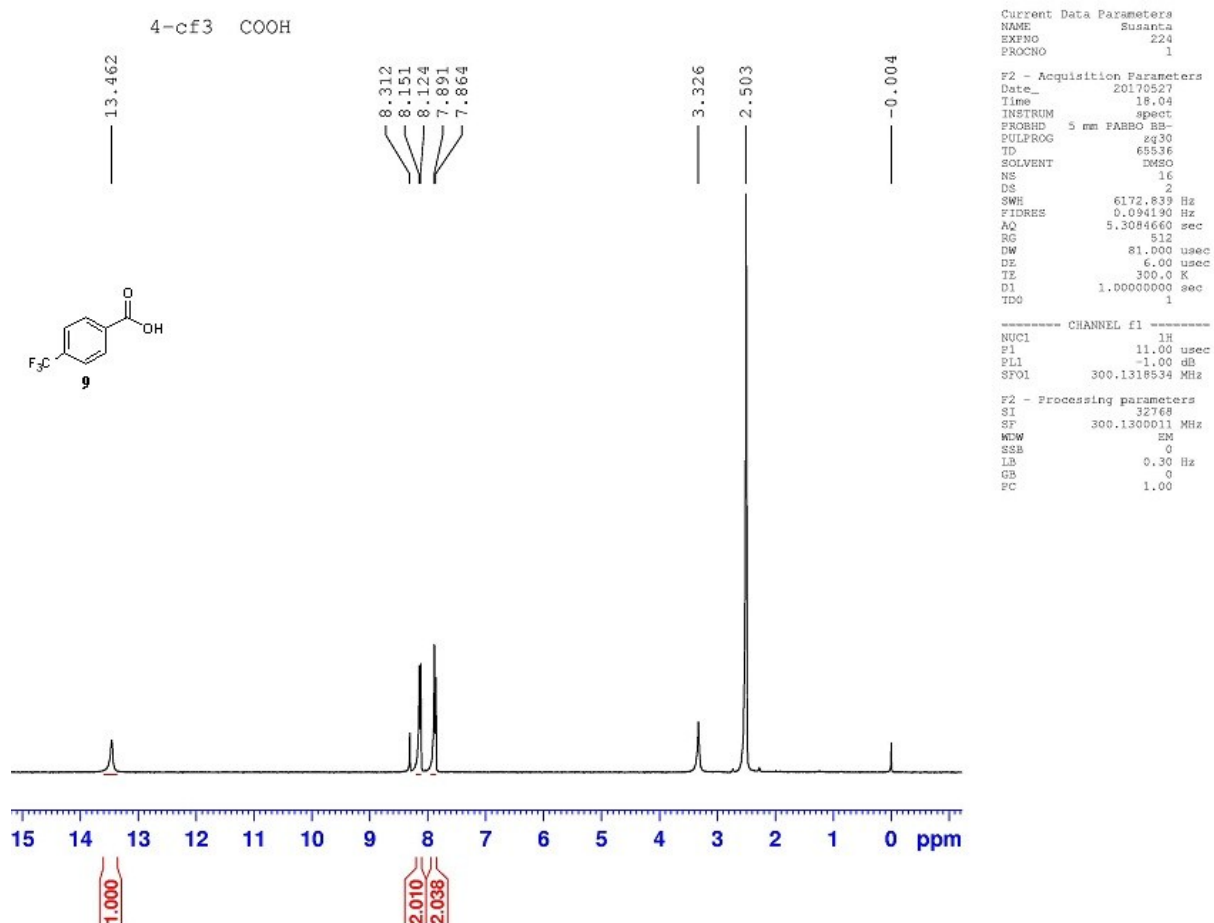

<sup>13</sup>C{<sup>1</sup>H}- NMR (in DMSO-d<sub>6</sub>) spectra of compound **9**

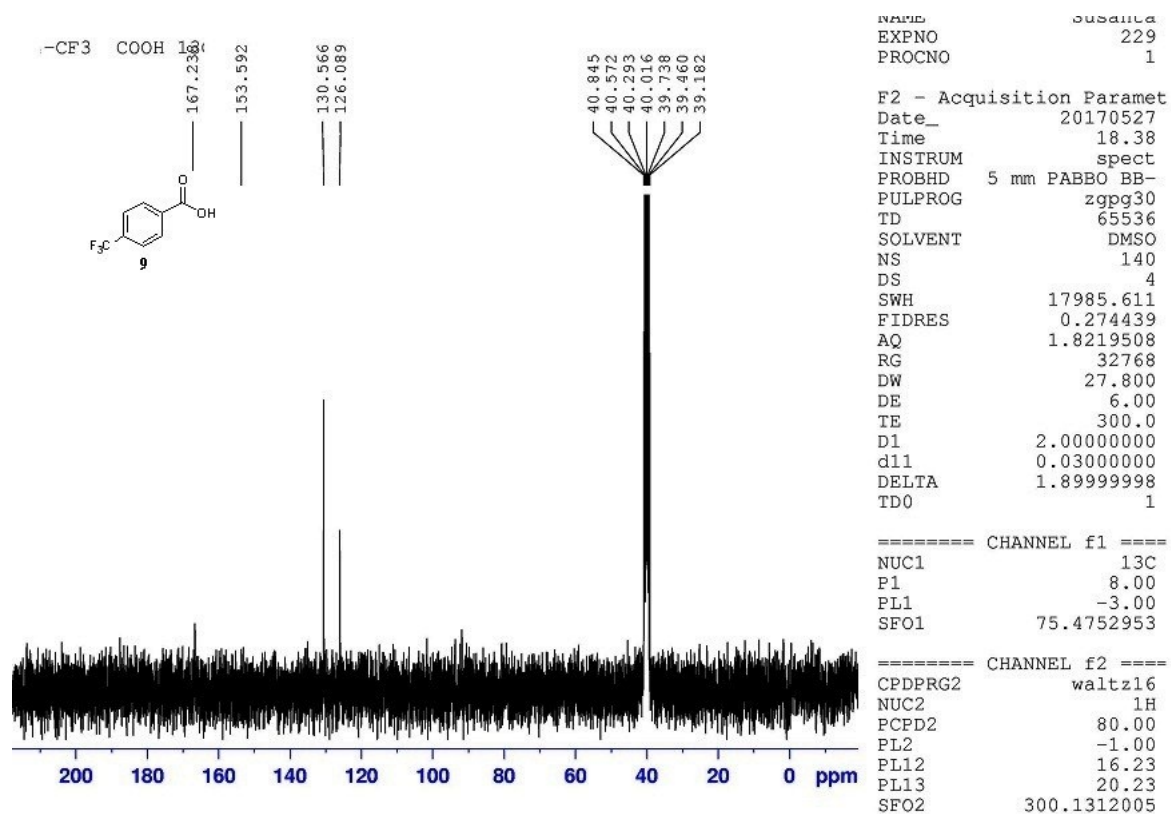

$^{13}\text{C}$ - NMR (in  $\text{DMSO-d}_6$ ) spectra of compound 9

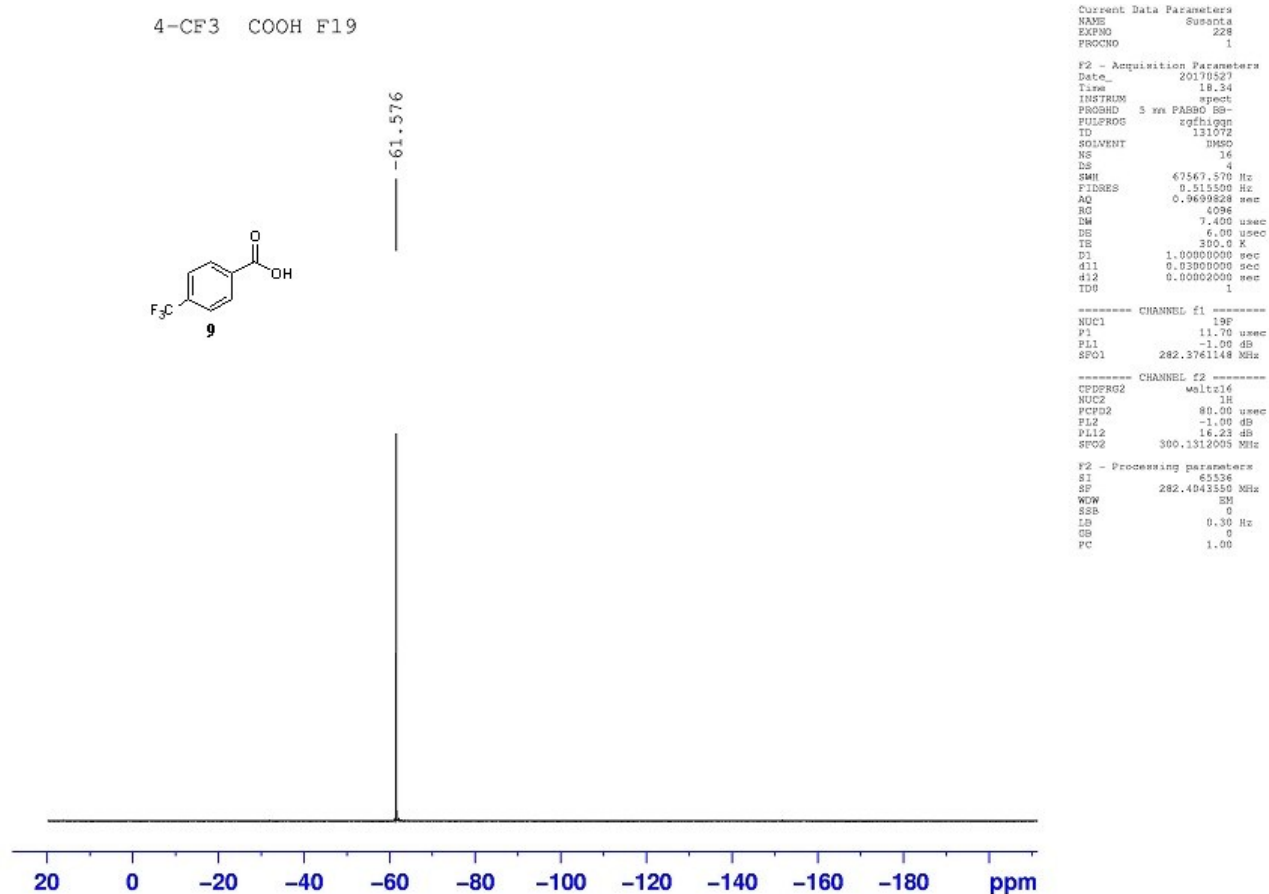

<sup>1</sup>H- NMR (in DMSO-d<sub>6</sub>) spectra of compound **9**

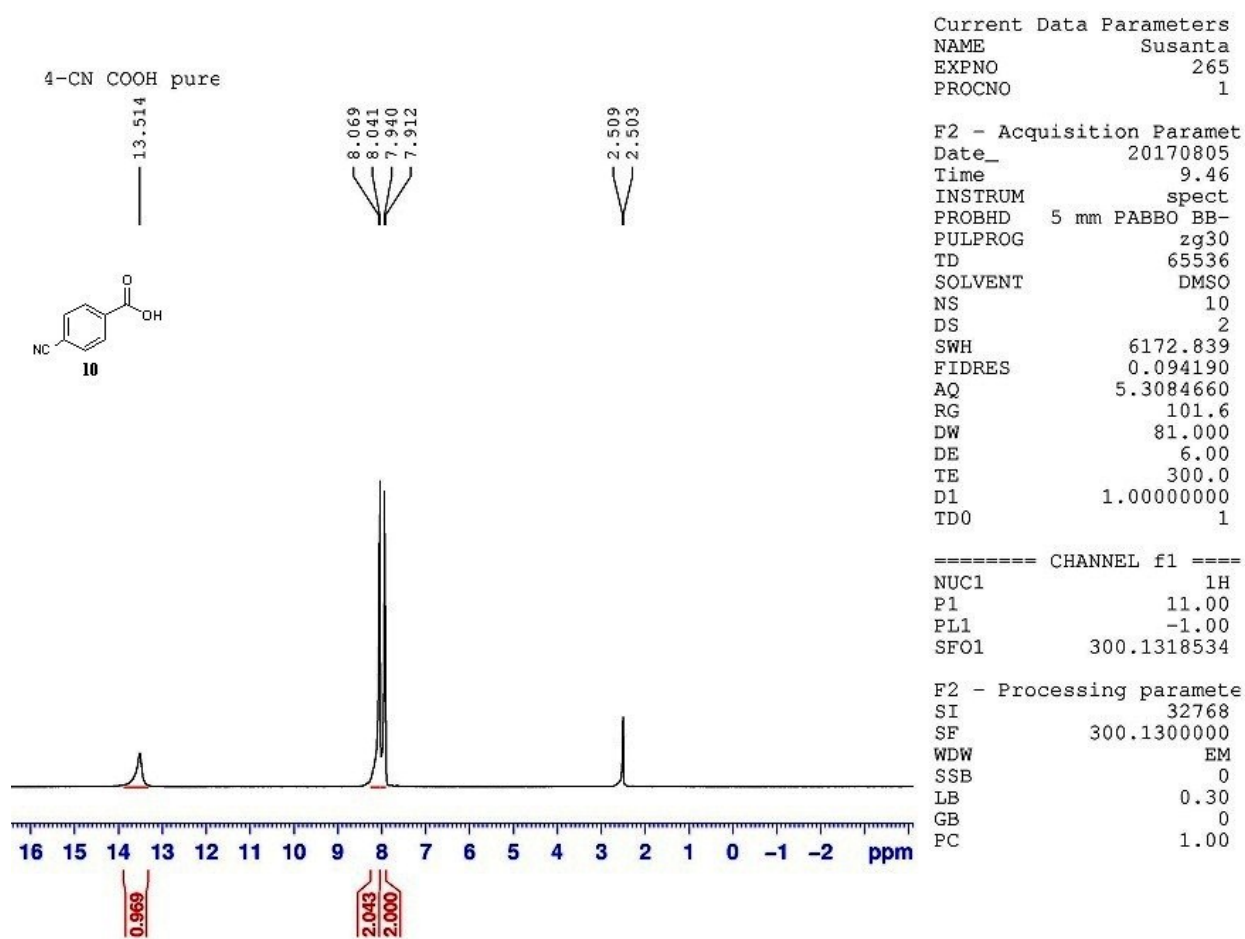

$^{13}\text{C}\{^1\text{H}\}$ - NMR (in  $\text{DMSO-d}_6$ ) spectra of compound **10**

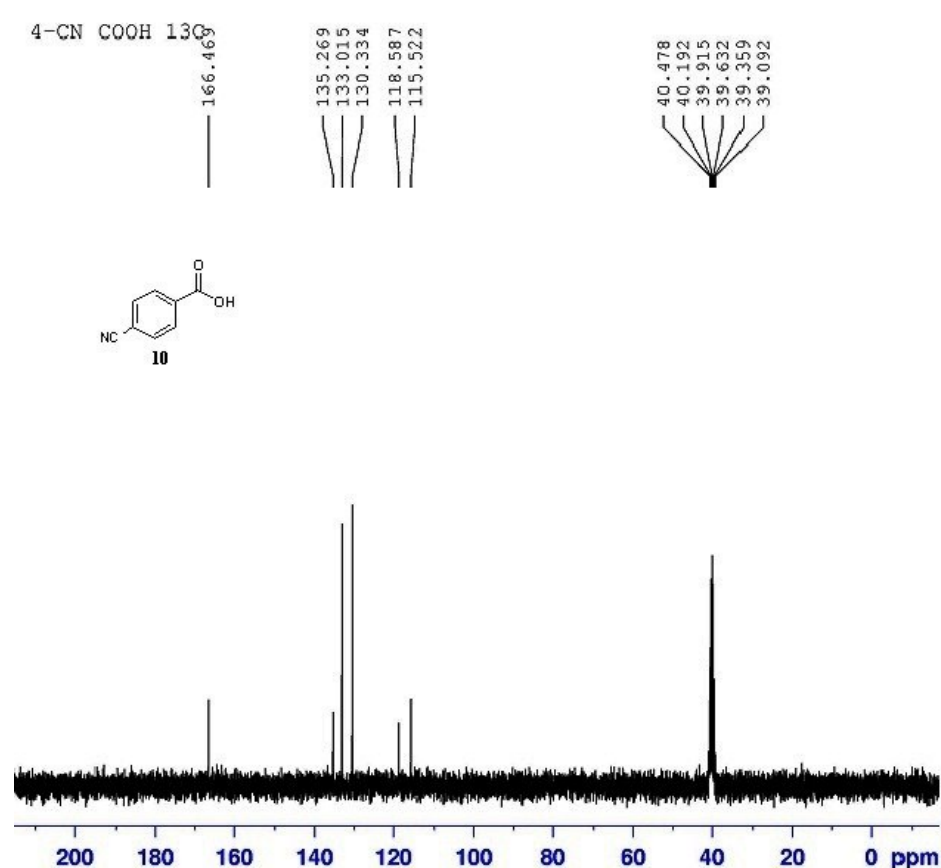

EXPNO 266  
PROCNO 1

F2 - Acquisition Paramet  
Date\_ 20170805  
Time 9.50  
INSTRUM spect  
PROBHD 5 mm PABBO BB-  
PULPROG zgpg30  
TD 65536  
SOLVENT DMSO  
NS 62  
DS 4  
SWH 17985.611  
FIDRES 0.274439  
AQ 1.8219508  
RG 32768  
DW 27.800  
DE 6.00  
TE 300.0  
D1 2.00000000  
d11 0.03000000  
DELTA 1.89999998  
TD0 1

===== CHANNEL f1 =====  
NUC1 <sup>13</sup>C  
P1 8.00  
PL1 -3.00  
SFO1 75.4752953

===== CHANNEL f2 =====  
CPDPRG2 waltz16  
NUC2 <sup>1</sup>H  
PCPD2 80.00  
PL2 -1.00  
PL12 16.23  
PT12 20.22

<sup>1</sup>H- NMR (in CDCl<sub>3</sub>) spectra of compound **11**

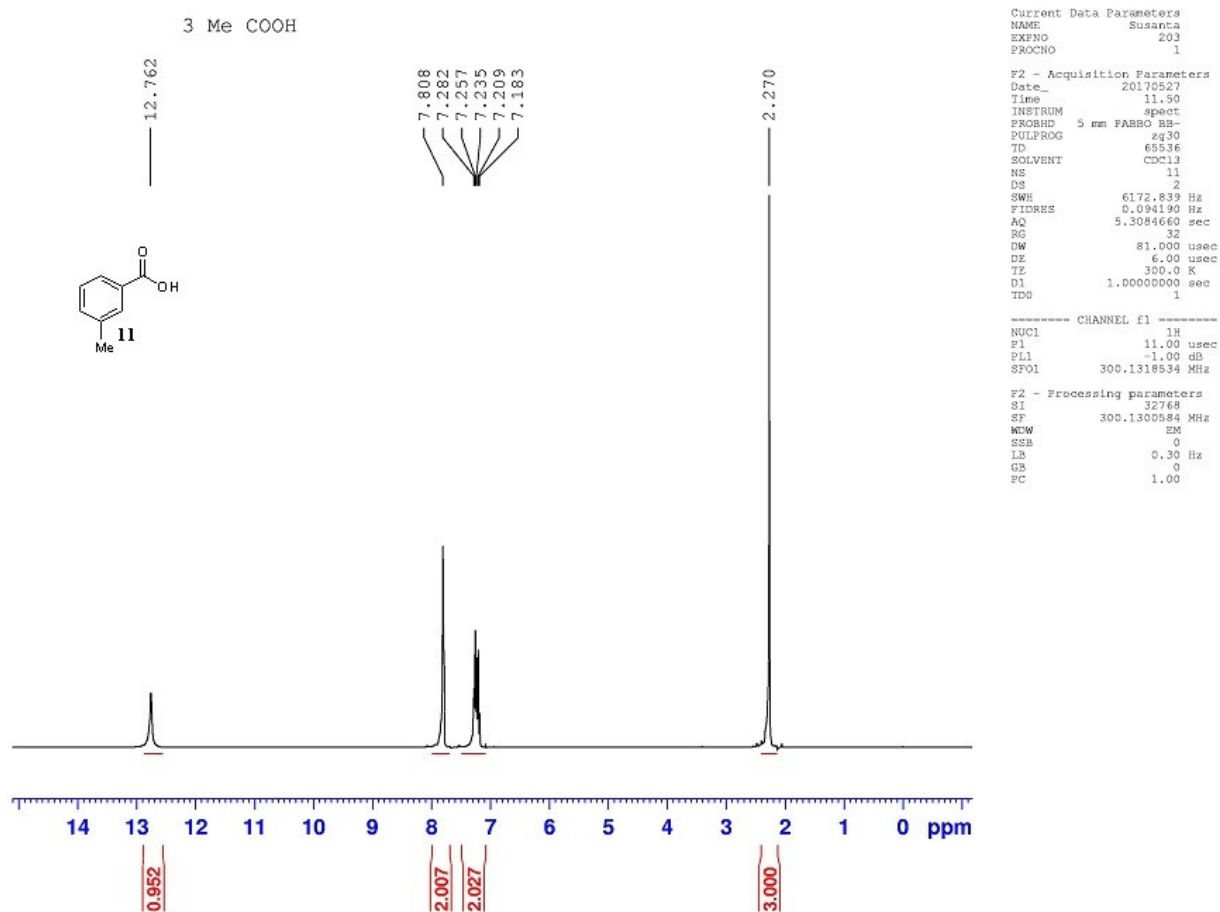

$^{13}\text{C}\{^1\text{H}\}$ - NMR (in  $\text{CDCl}_3$ ) spectra of compound **11**

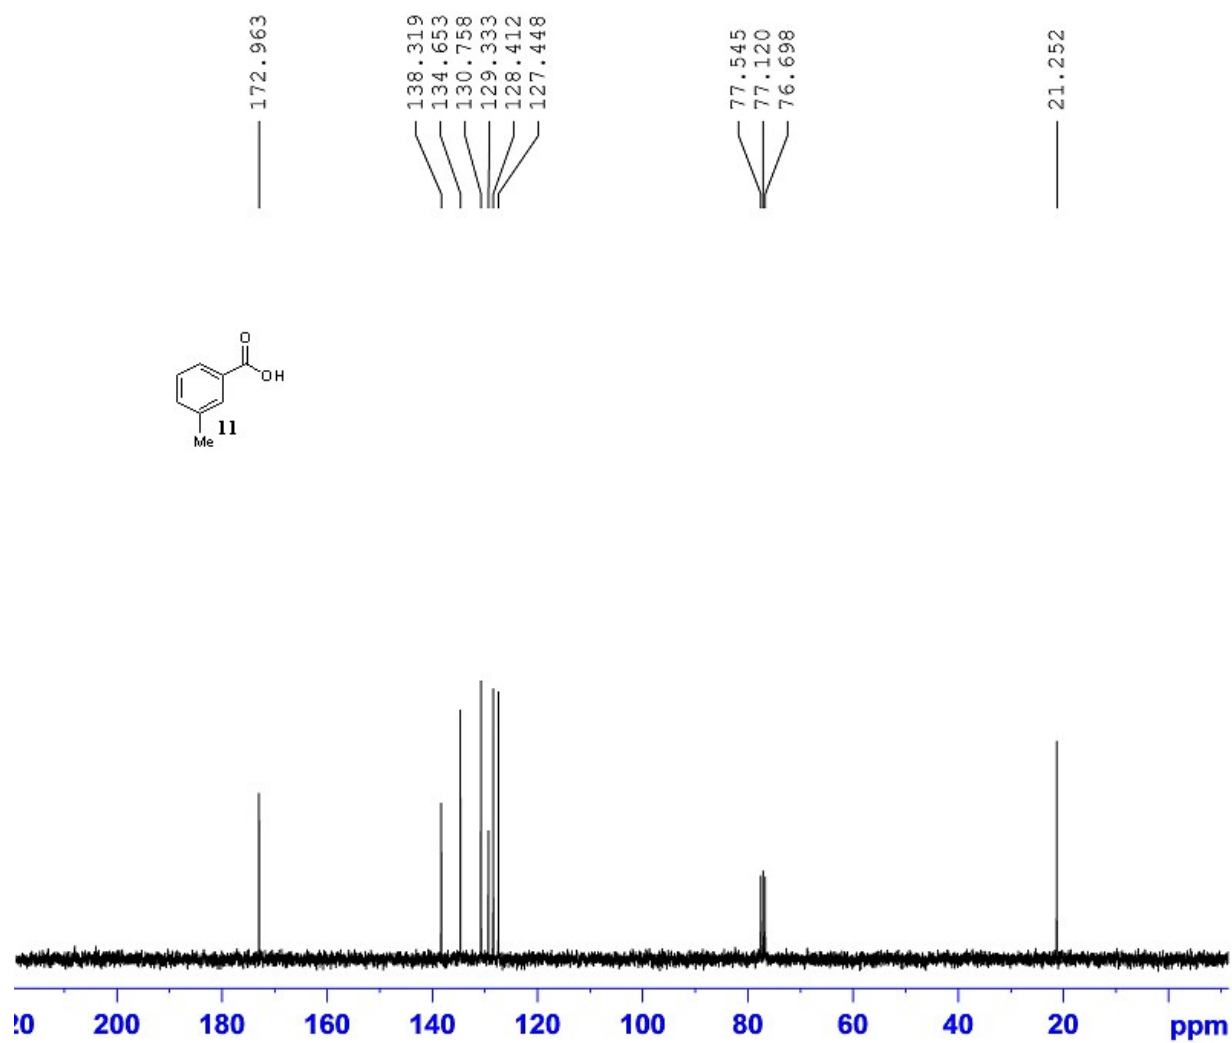

$^1\text{H}$ - NMR (in  $\text{DMSO-d}_6$ ) spectra of compound **12**

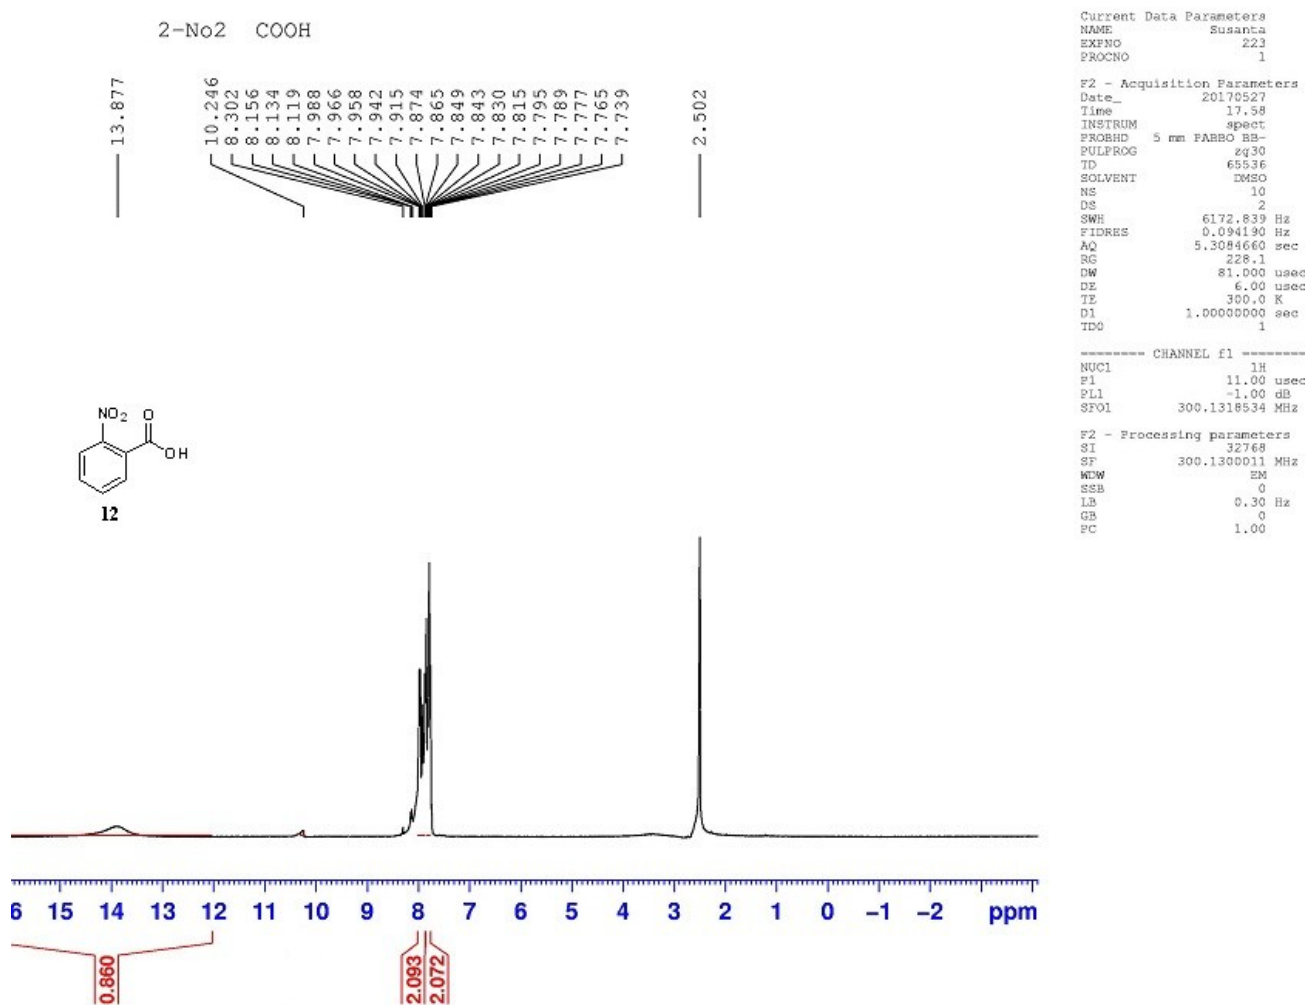

<sup>1</sup>H- NMR (in DMSO-d<sub>6</sub>) spectra of compound **13**

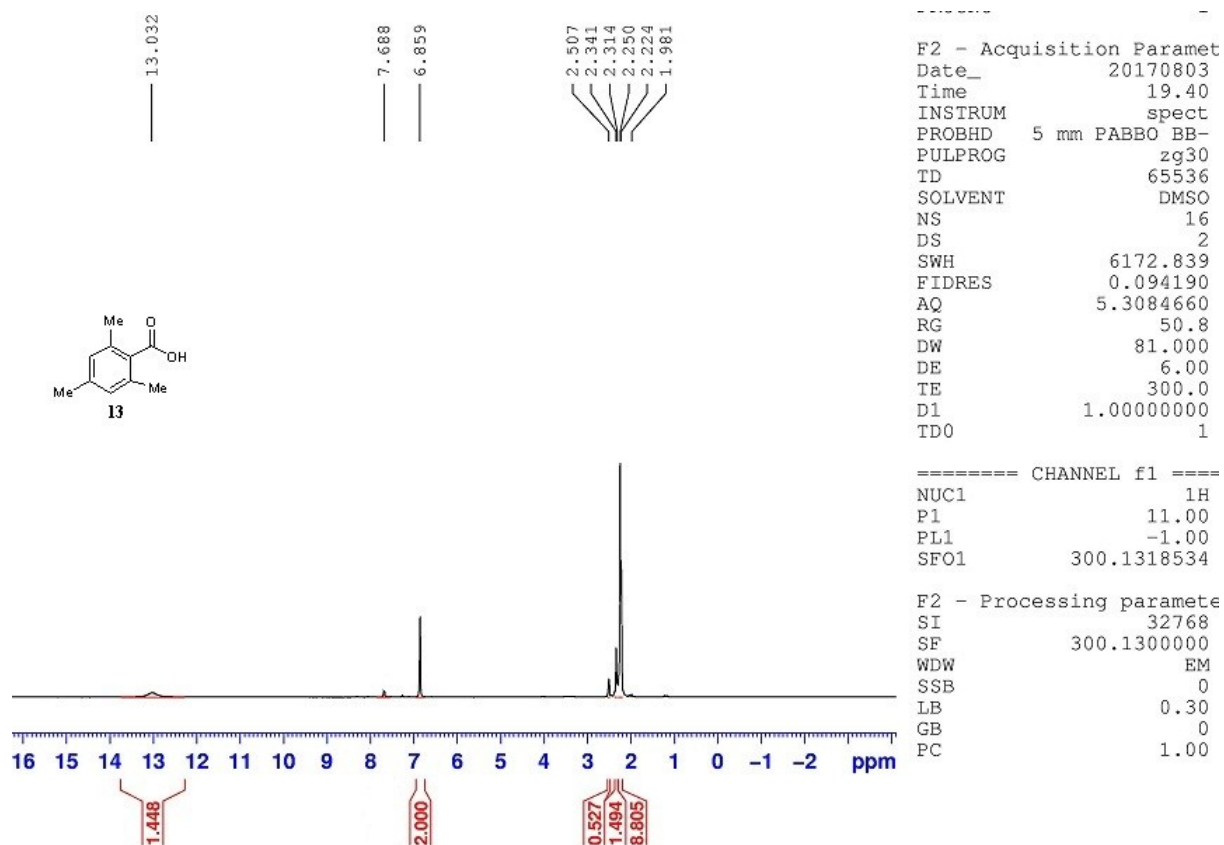

<sup>13</sup>C{<sup>1</sup>H}- NMR (in DMSO-d<sub>6</sub>) spectra of compound **13**

Me -COOH 13

171.280  
138.435  
134.339  
134.138  
132.978  
128.706  
128.419

40.736  
40.450  
40.161  
39.882  
39.604  
39.319  
21.023  
19.746  
19.501

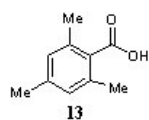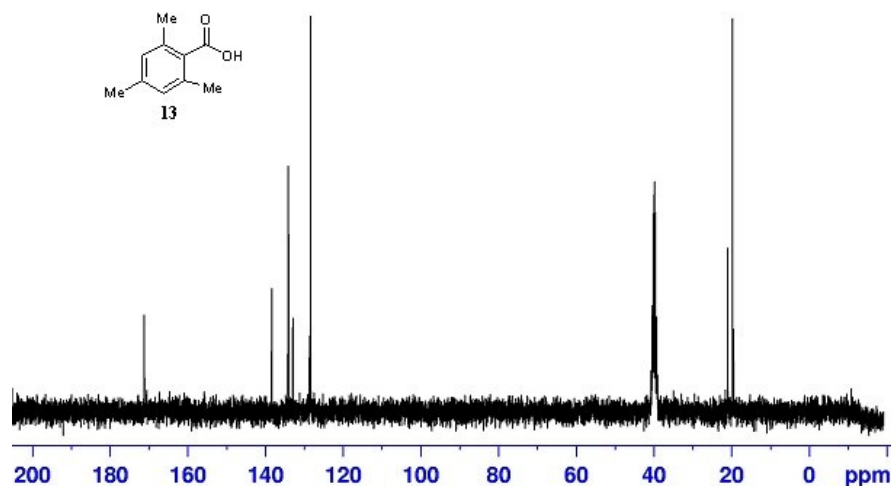

PROCNO 1

F2 - Acquisition Paramet

Date\_ 20170803

Time 19.54

INSTRUM spect

PROBHD 5 mm PABBO BB-

PULPROG zgpg30

TD 65536

SOLVENT DMSO

NS 115

DS 4

SWH 17985.611

FIDRES 0.274439

AQ 1.8219508

RG 32768

DW 27.800

DE 6.00

TE 300.0

D1 2.00000000

d11 0.03000000

DELTA 1.89999998

TD0 1

===== CHANNEL f1 =====

NUC1 13C

P1 8.00

PL1 -3.00

SFO1 75.4752953

===== CHANNEL f2 =====

CPDPRG2 waltz16

NUC2 1H

PCPD2 80.00

PL2 -1.00

PL12 16.23

PL13 20.23

SFO2 300.1312005

<sup>1</sup>H- NMR (in DMSO-d<sub>6</sub>) spectra of compound **15**

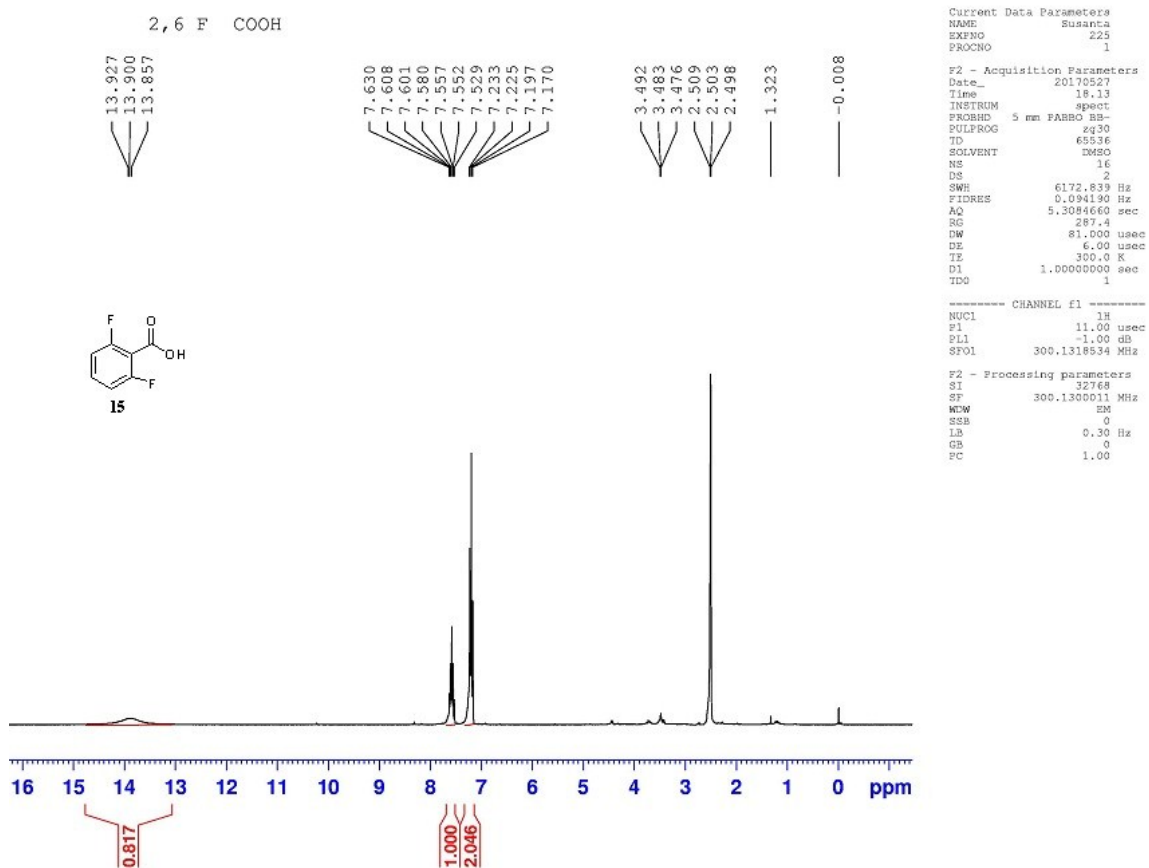

$^{13}\text{C}\{^1\text{H}\}$ - NMR (in DMSO- $\text{d}_6$ ) spectra of compound **15**

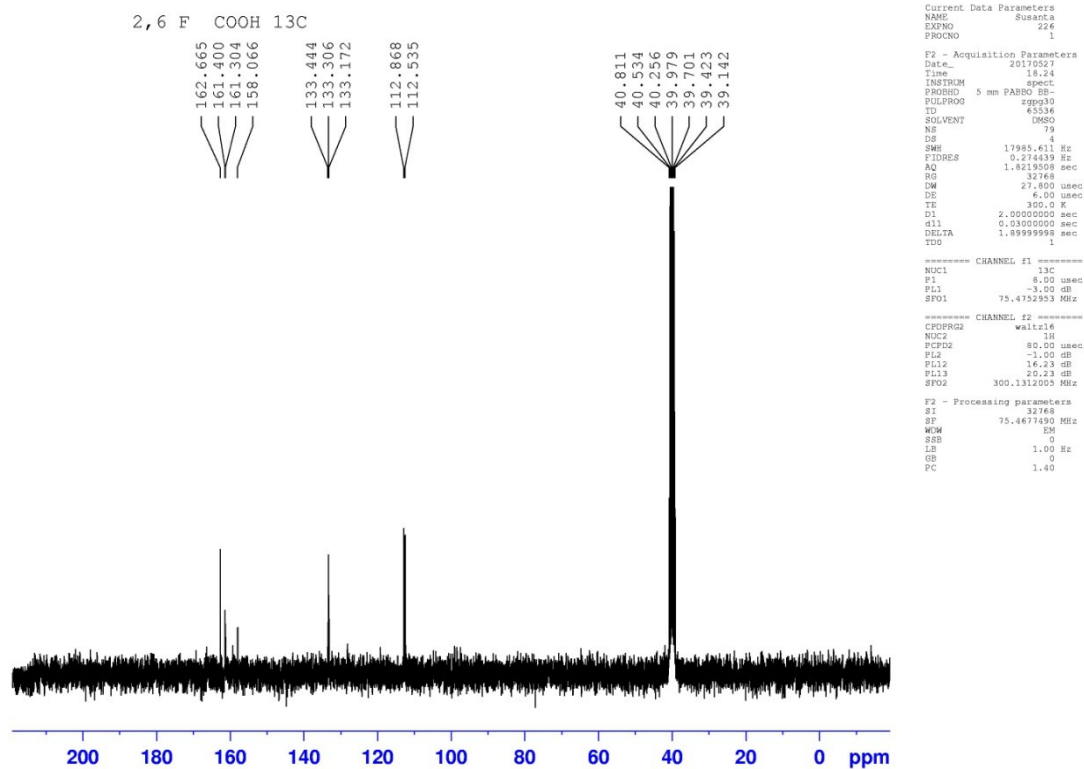

<sup>19</sup>F- NMR (in DMSO-d<sub>6</sub>) spectra of compound **15**

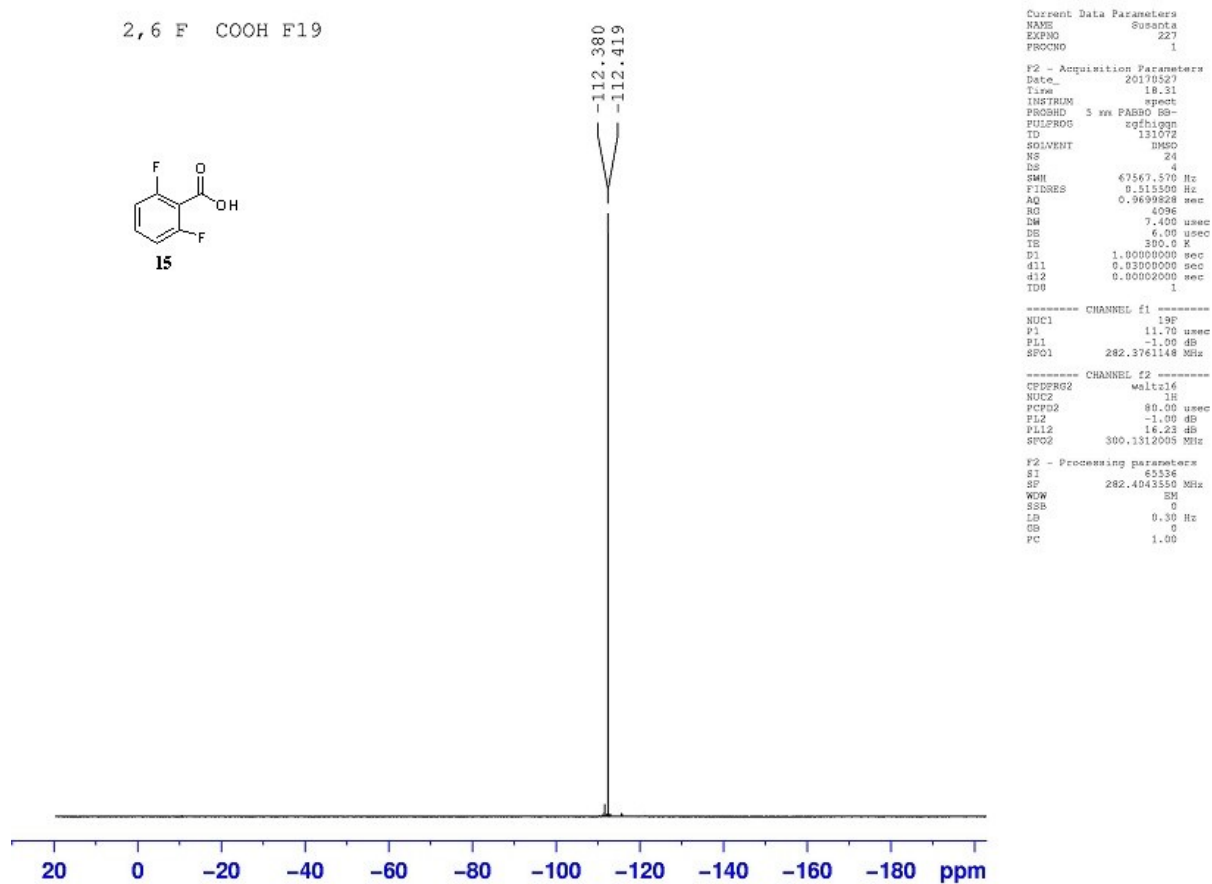

<sup>1</sup>H- NMR (in CDCl<sub>3</sub>) spectra of compound **16**

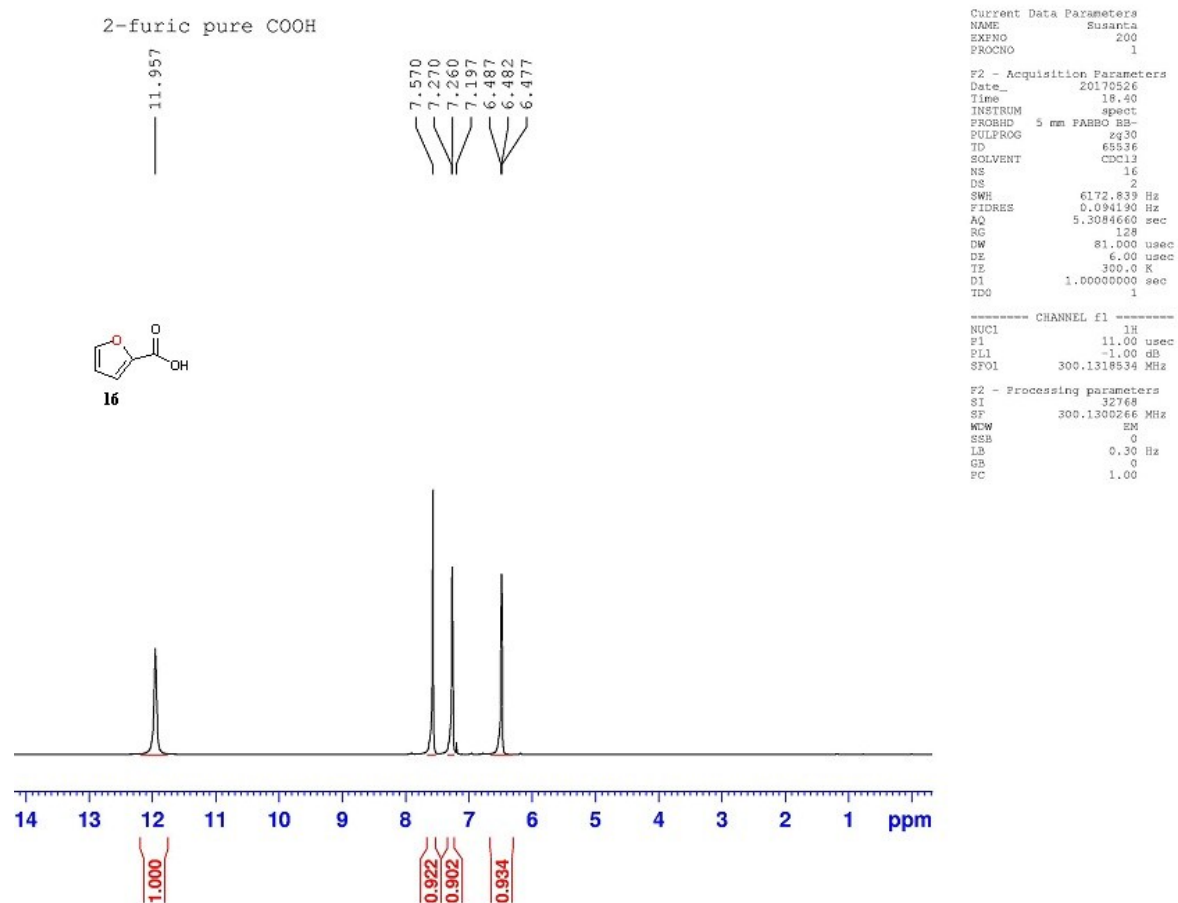

$^{13}\text{C}\{^1\text{H}\}$ - NMR (in  $\text{CDCl}_3$ ) spectra of compound **16**

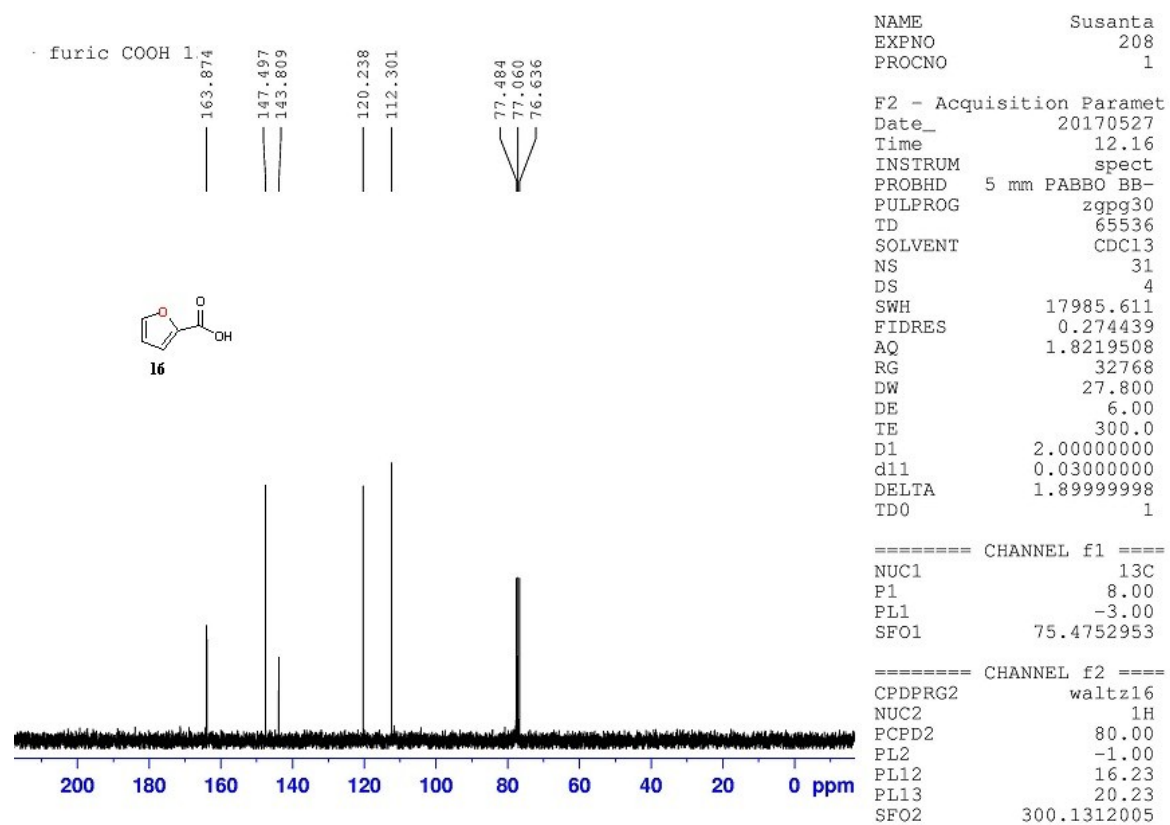

<sup>1</sup>H- NMR (in CDCl<sub>3</sub>) spectra of compound **17**

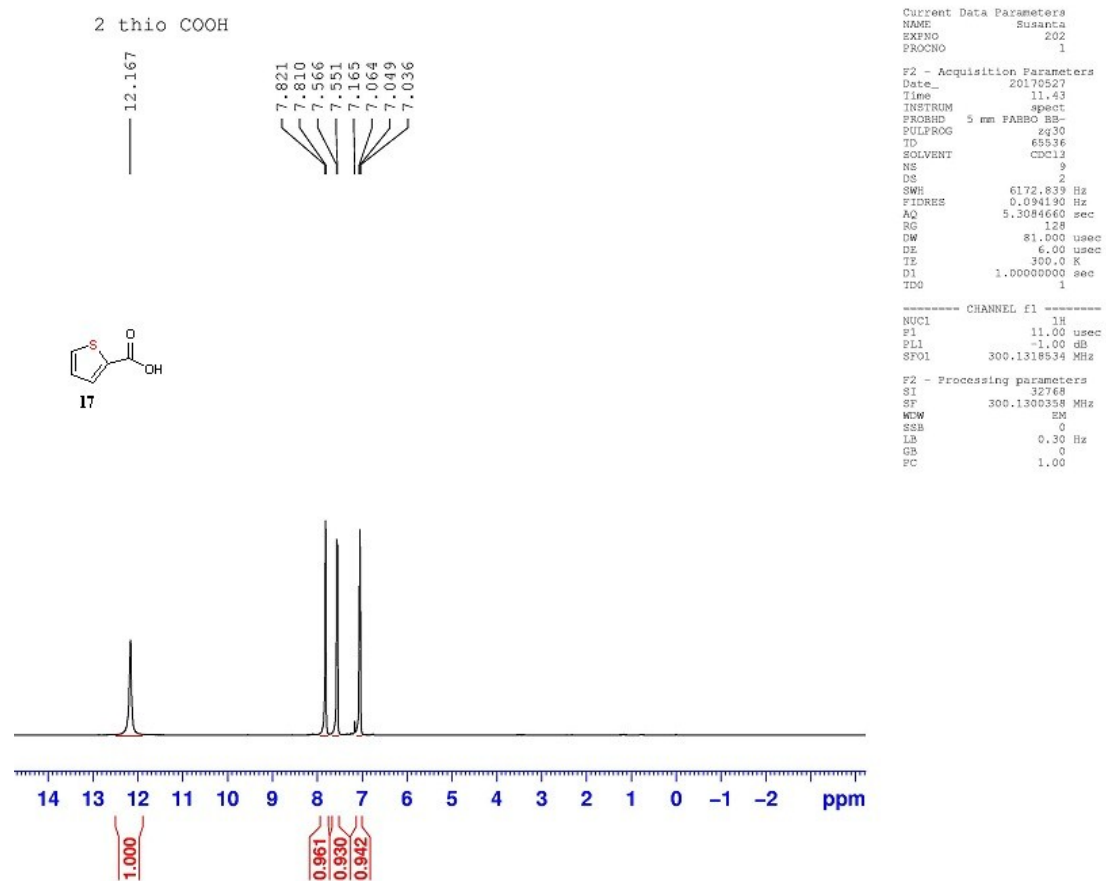

$^{13}\text{C} \{^1\text{H}\}$ - NMR (in  $\text{CDCl}_3$ ) spectra of compound **17**

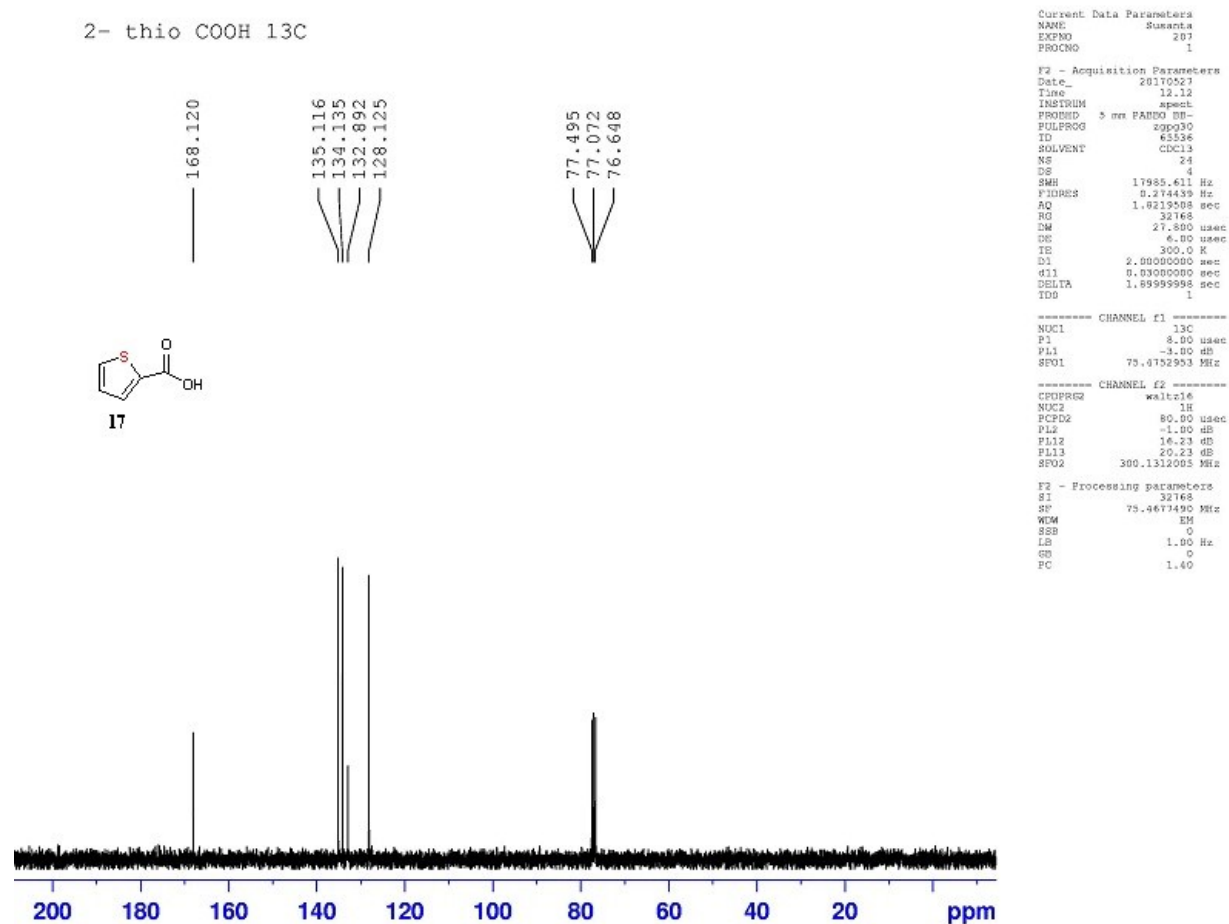

<sup>1</sup>H- NMR (in DMSO-d<sub>6</sub>) spectra of compound **18**

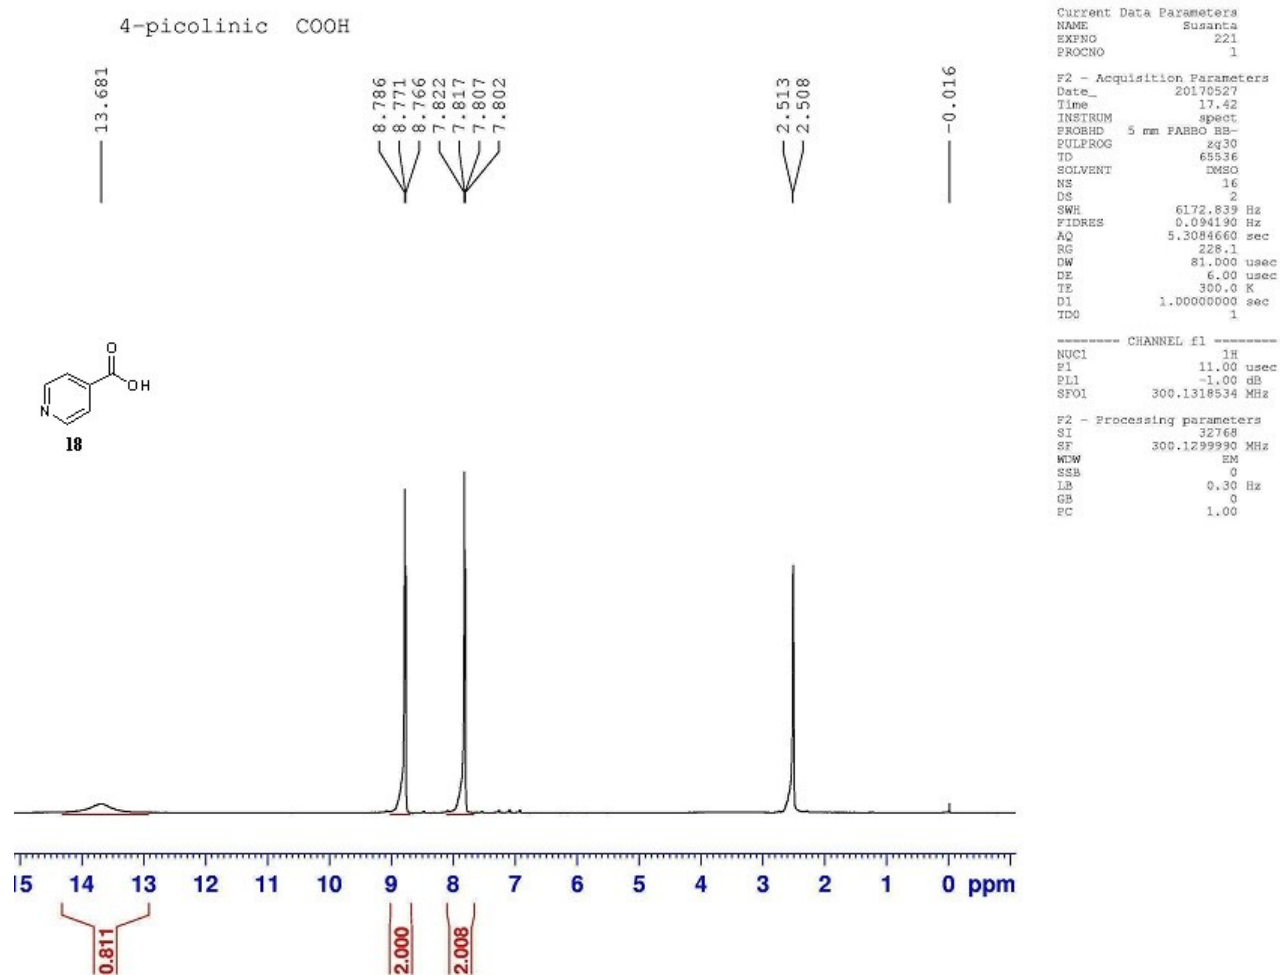

$^{13}\text{C}\{^1\text{H}\}$ - NMR (in DMSO- $d_6$ ) spectra of compound **18**

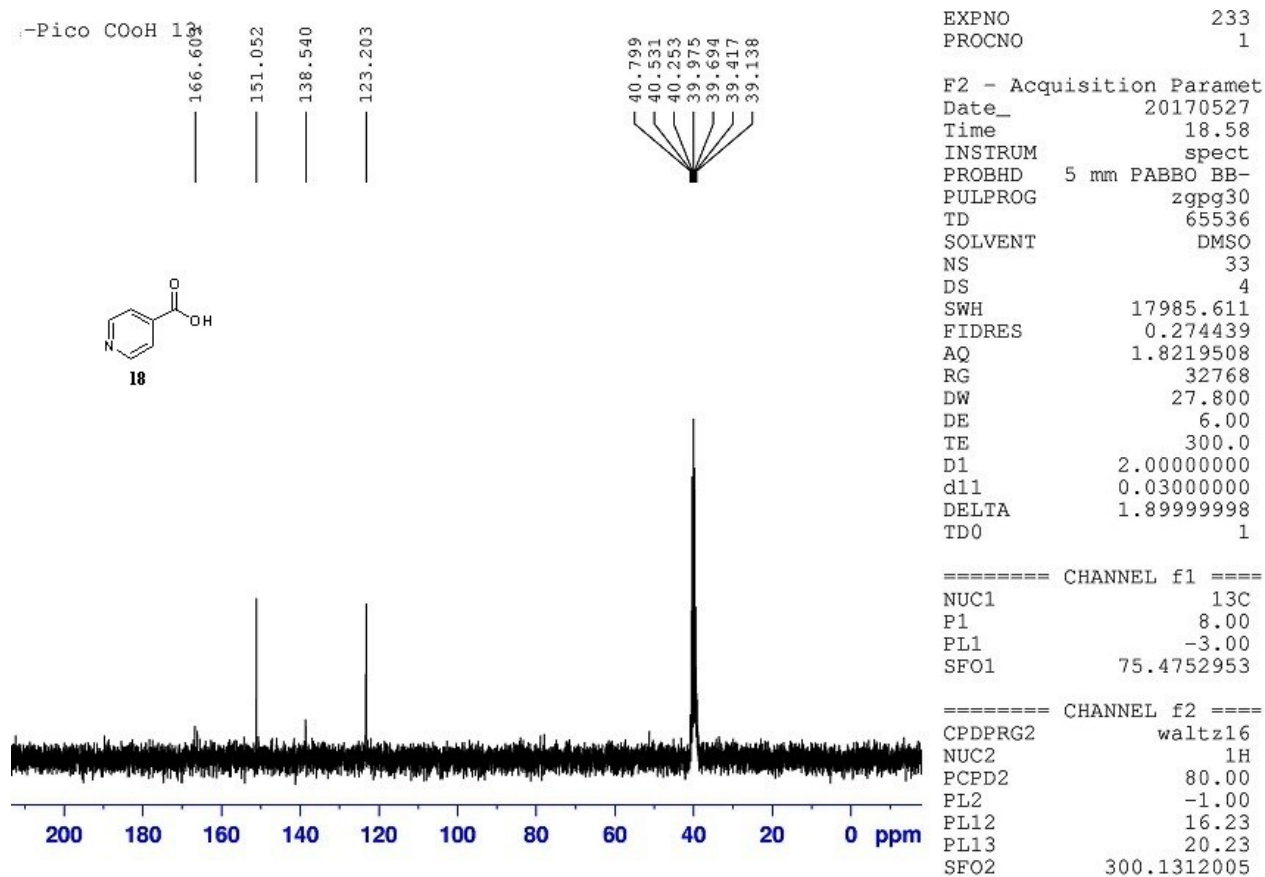

<sup>1</sup>H- NMR (in DMSO-d<sub>6</sub>) spectra of compound **19**

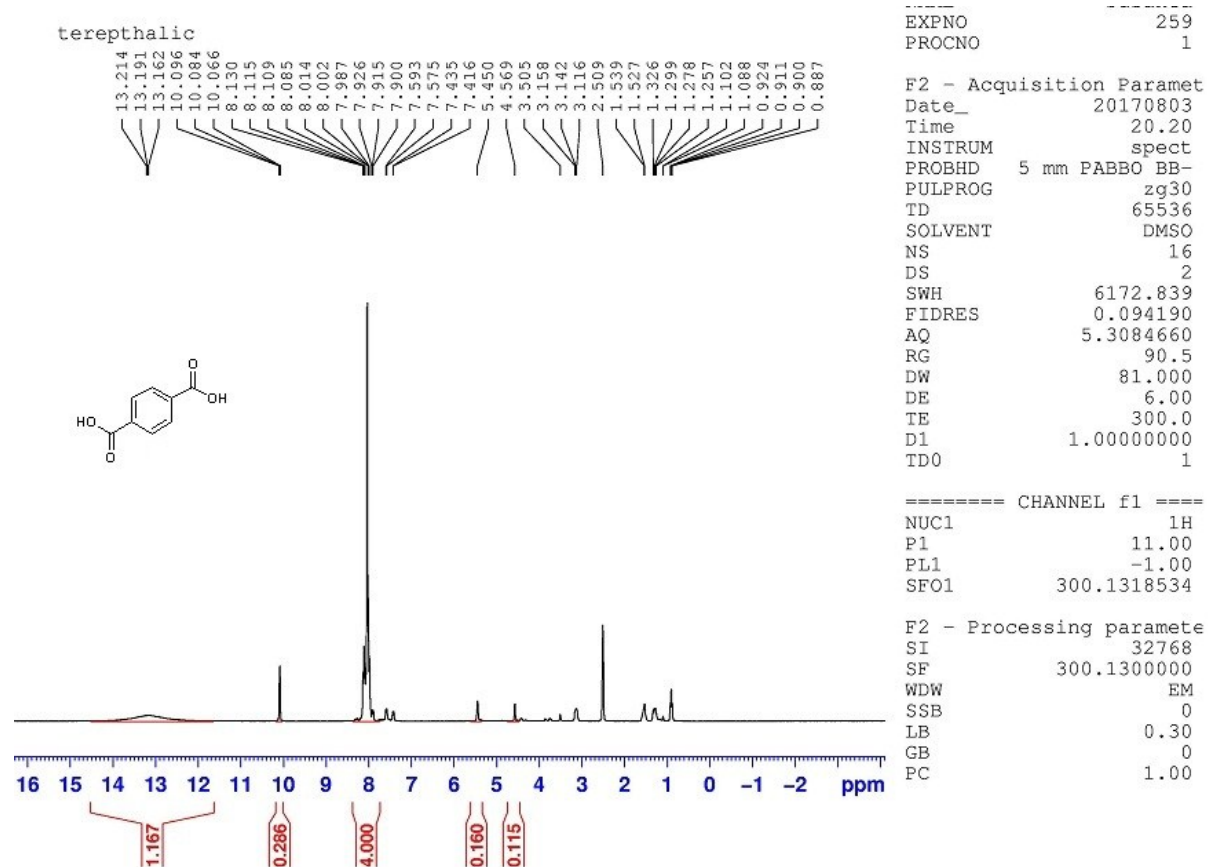

<sup>1</sup>H- NMR (in DMSO-d<sub>6</sub>) spectra of compound **20**

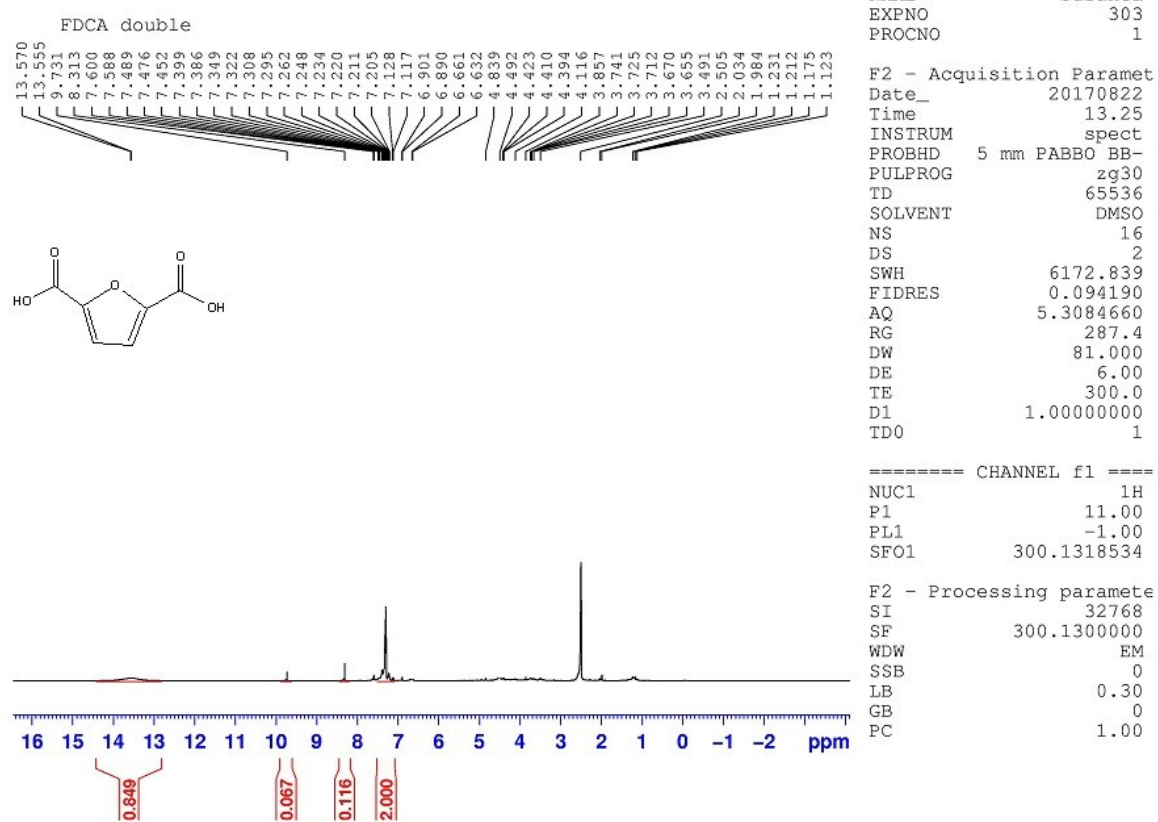

$^{13}\text{C}\{^1\text{H}\}$ - NMR (in DMSO- $d_6$ ) spectra of compound **20**

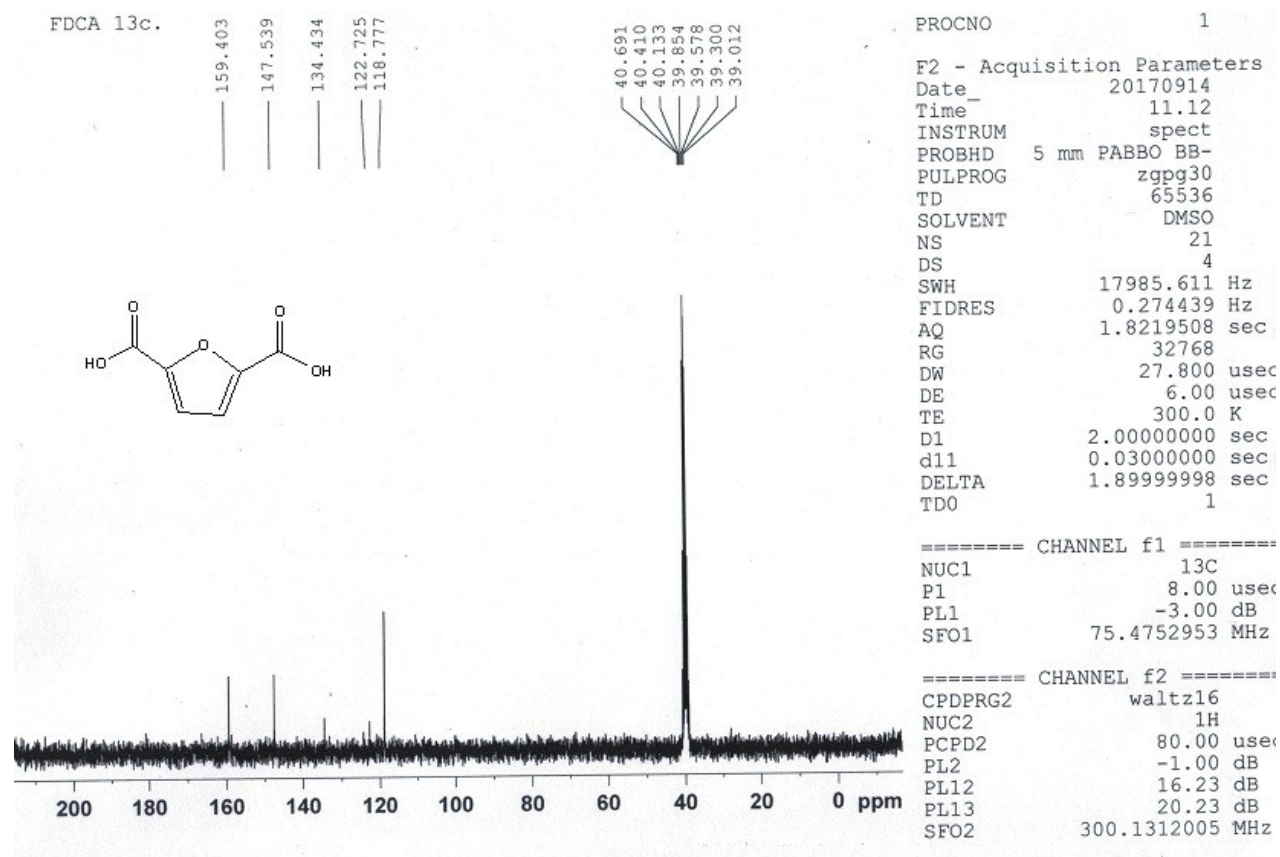

<sup>1</sup>H- NMR (in DMSO-d<sub>6</sub>) spectra of compound **21**

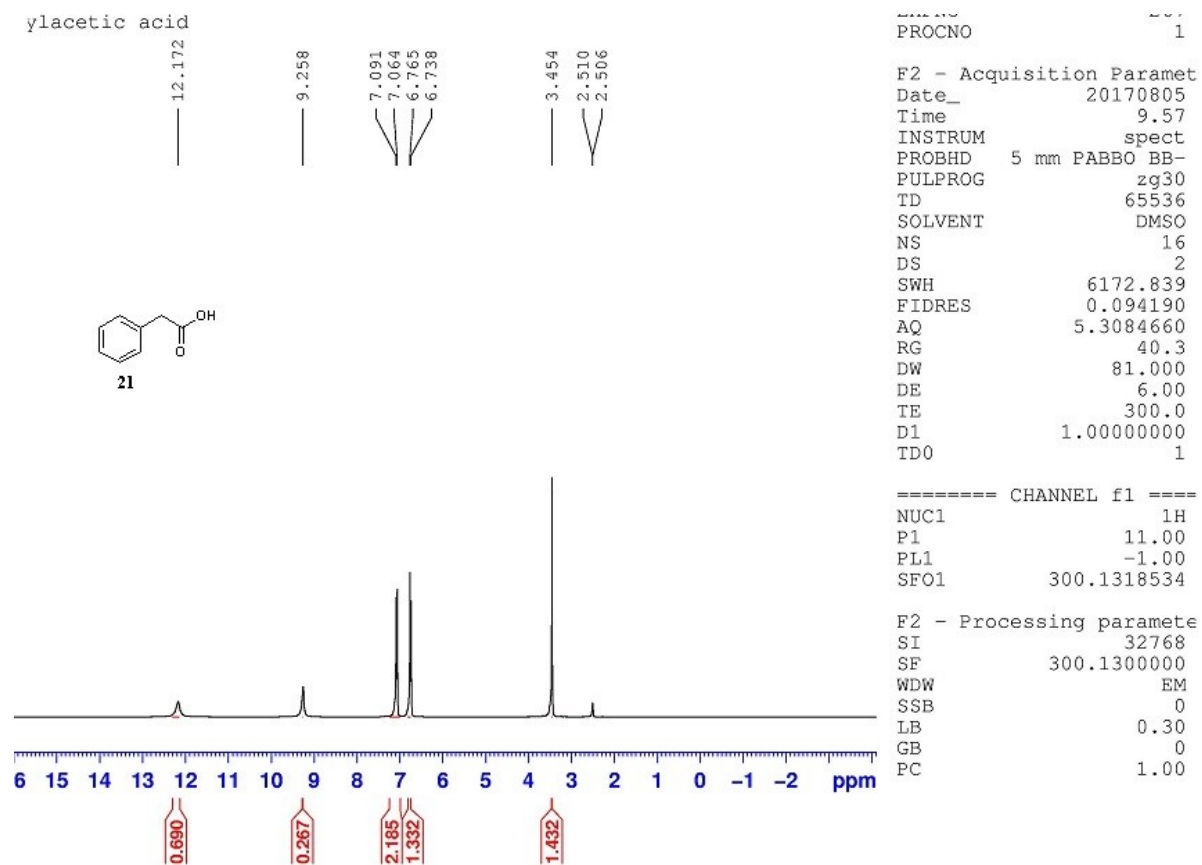

$^{13}\text{C}\{^1\text{H}\}$ - NMR (in DMSO- $d_6$ ) spectra of compound **21**

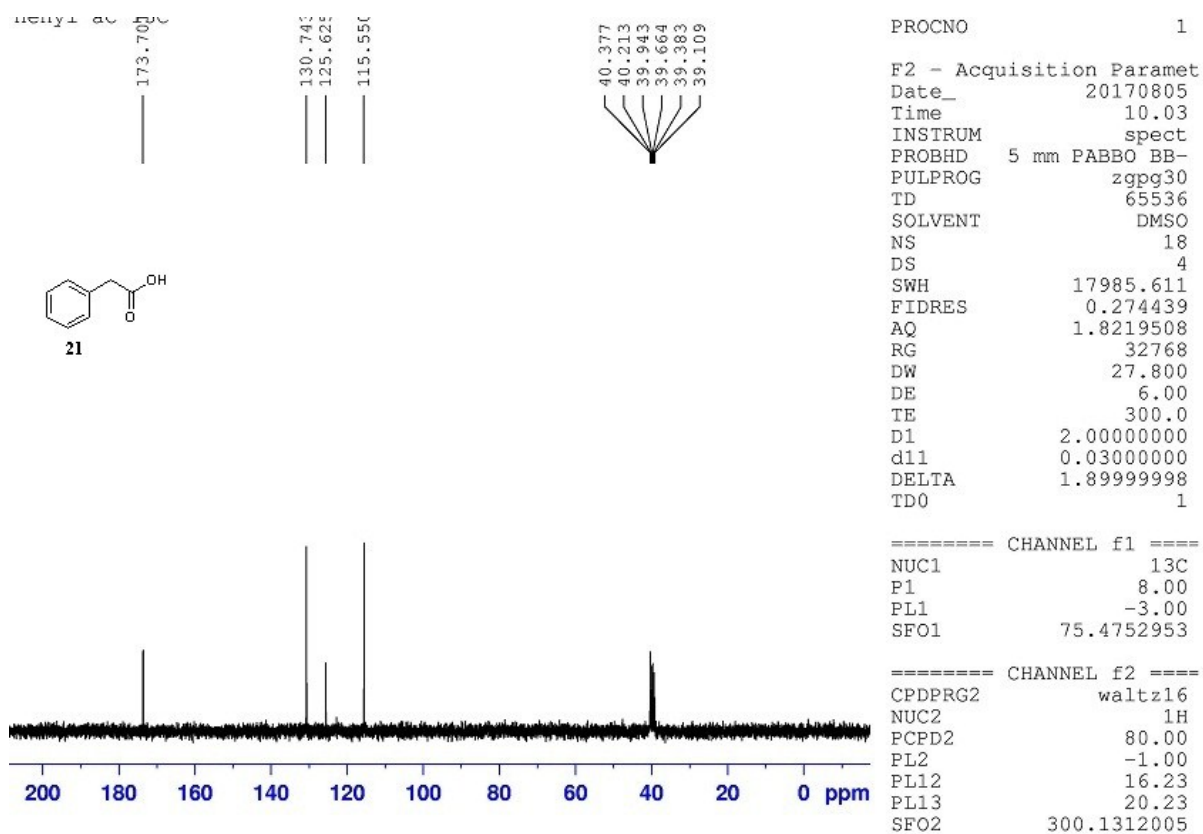

$^{13}\text{C}\{^1\text{H}\}$ - NMR (in  $\text{CDCl}_3$ ) spectra of compound **24**

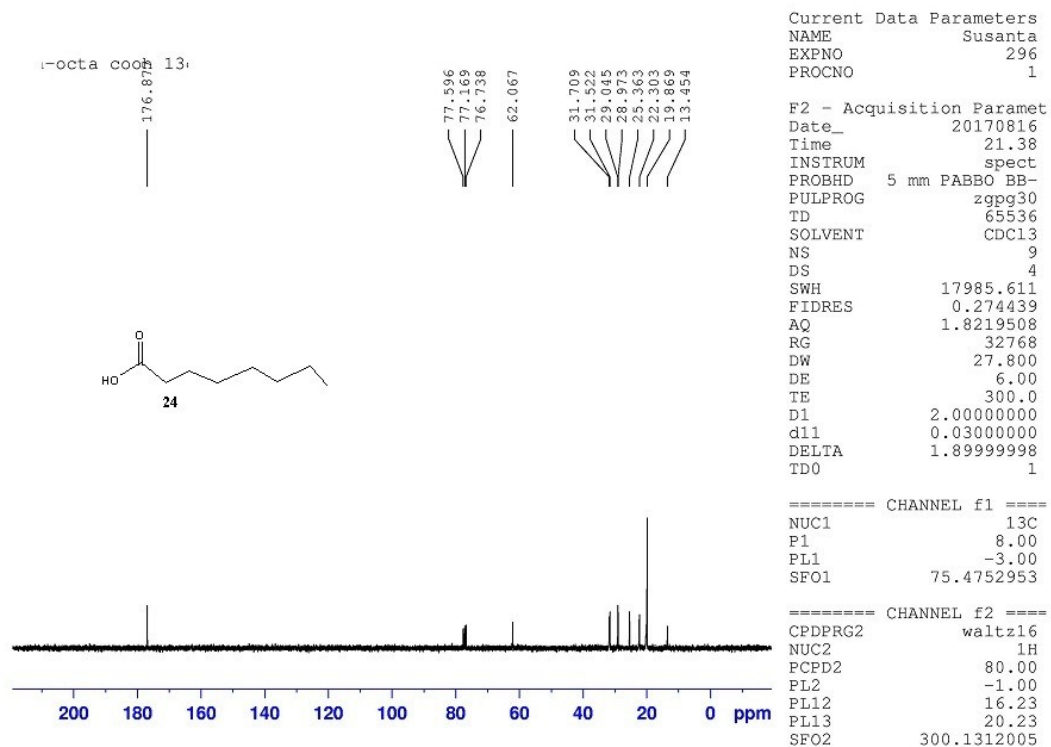

<sup>1</sup>H- NMR (in DMSO-d<sub>6</sub>) spectra of compound **25**

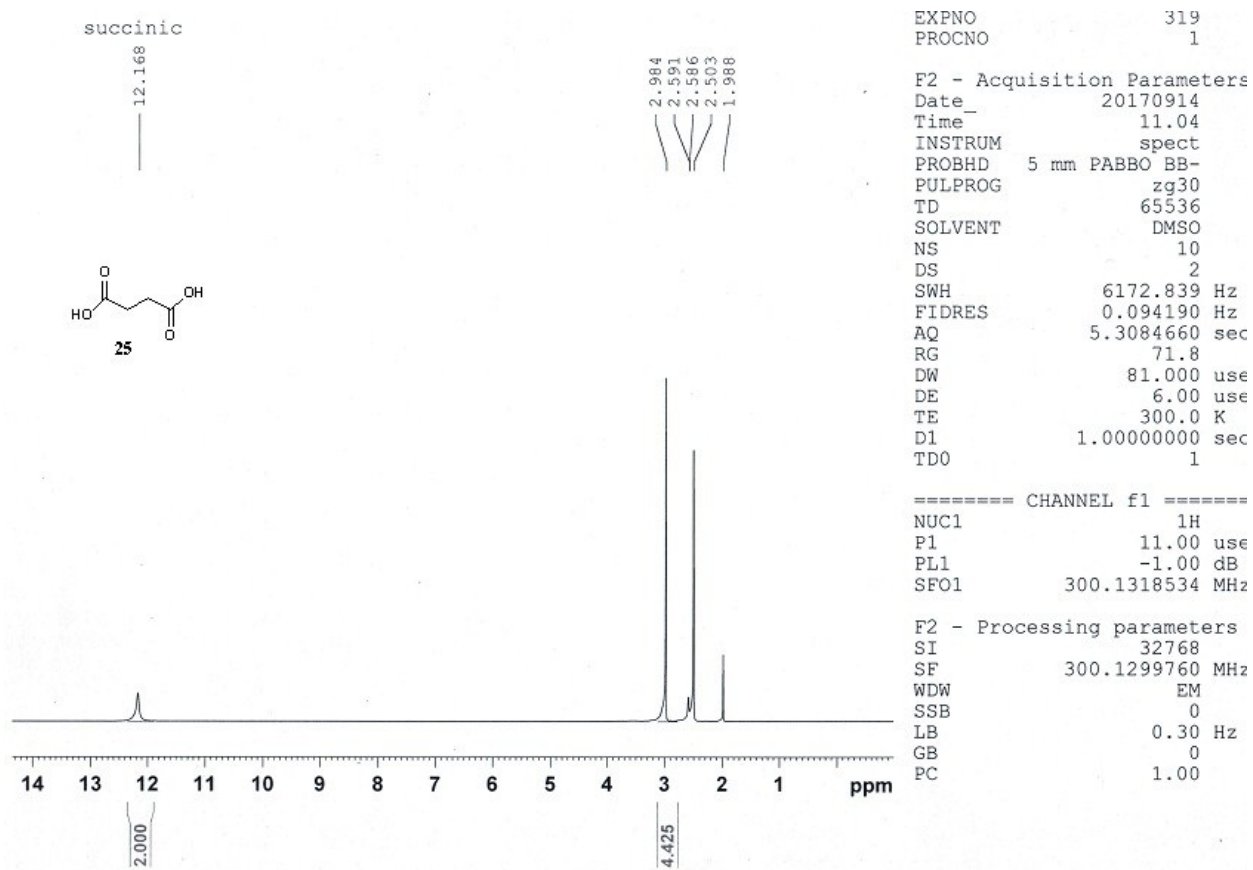

$^{13}\text{C}\{^1\text{H}\}$ - NMR (in  $\text{CDCl}_3$ ) spectra of compound **25**

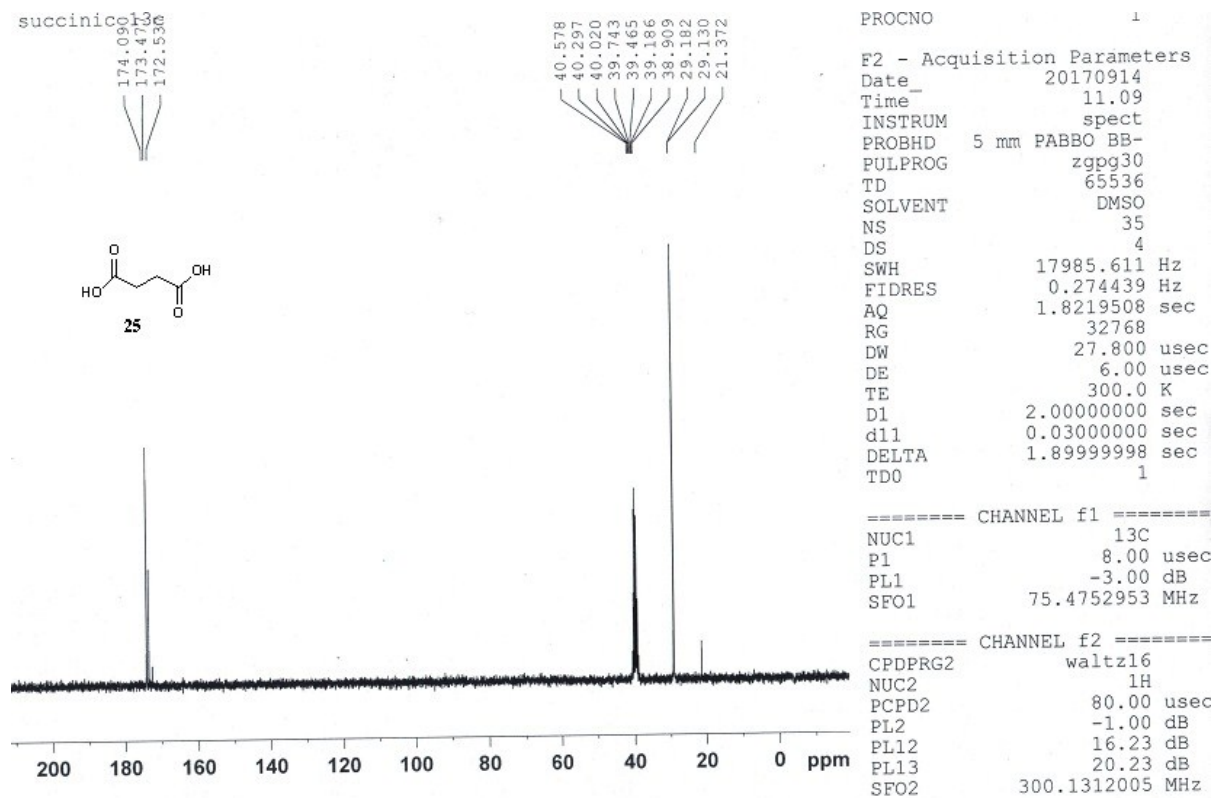

<sup>1</sup>H- NMR (in CDCl<sub>3</sub>) spectra of HMF

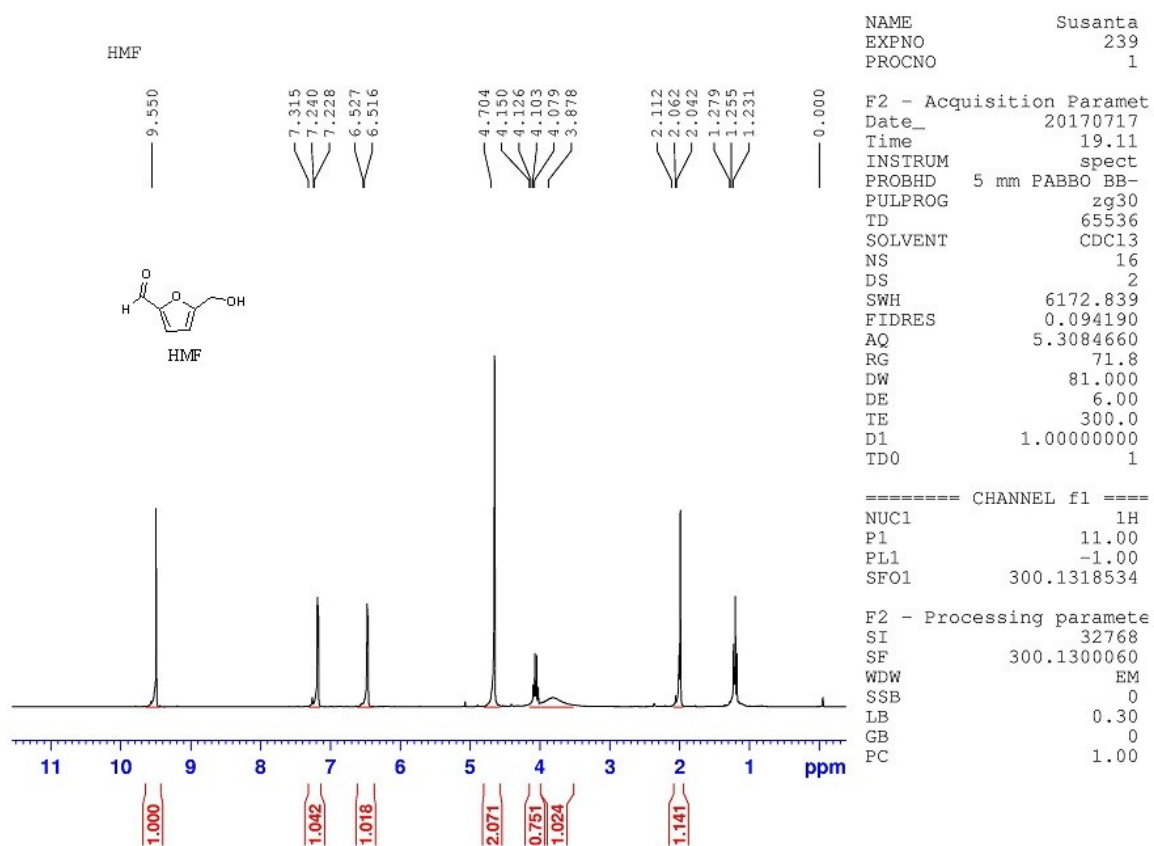

$^{13}\text{C}\{^1\text{H}\}$ - NMR (in  $\text{CDCl}_3$ ) spectra of HMF

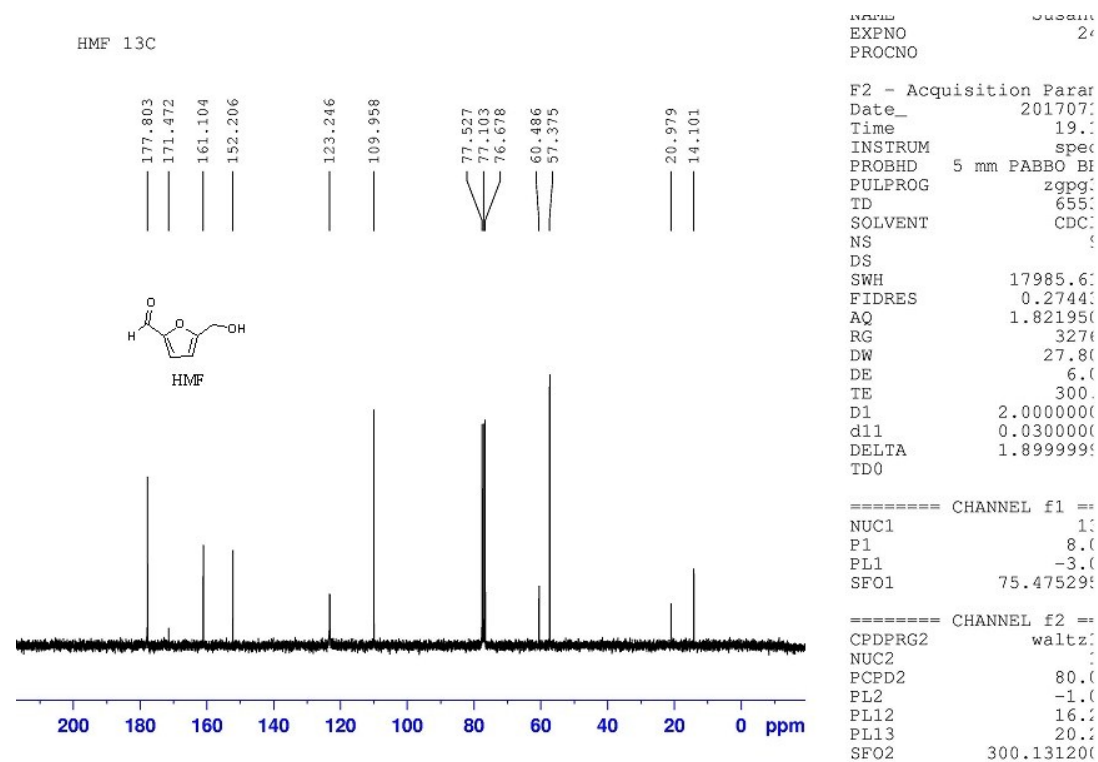

Supplement: c7gc02802d1.pdf [file c7gc02802d1.pdf]
